33

## **Abstract**

34 Major cell entry factors of SARS-CoV-2 are present in neurons; however, the neurotropism of  
35 SARS-CoV-2 and the phenotypes of infected neurons are still unclear. Acute neurological disorders occur  
36 in many patients, and one-third of COVID-19 survivors suffer from “brain diseases”. Here, we show that  
37 SARS-CoV-2 invades the brains of five patients with COVID-19 and Alzheimer’s, autism, frontotemporal  
38 dementia or no underlying condition by infecting neurons and other cells in the cortex. SARS-CoV-2  
39 induces or enhances Alzheimer’s-like neuropathology with manifestations of  $\beta$ -amyloid aggregation and  
40 plaque formation, tauopathy, neuroinflammation and cell death. SARS-CoV-2 infects mature but not  
41 immature neurons derived from inducible pluripotent stem cells from healthy and Alzheimer’s individuals  
42 through its receptor ACE2 and facilitator neuropilin-1. SARS-CoV-2 triggers Alzheimer’s-like gene  
43 programs in healthy neurons and exacerbates Alzheimer’s neuropathology. A gene signature defined as an  
44 Alzheimer’s infectious etiology is identified through SARS-CoV-2 infection, and silencing the top three  
45 downregulated genes in human primary neurons recapitulates the neurodegenerative phenotypes of SARS-  
46 CoV-2. Thus, SARS-CoV-2 invades the brain and activates an Alzheimer’s-like program.

## 47 **Introduction**

48       The COVID-19 pandemic caused by severe acute respiratory syndrome coronavirus 2 (SARS-CoV-  
49 2) has infected at least 213 million people worldwide and 37.8 million Americans to date. SARS-CoV-2  
50 not only causes respiratory syndromes but also leads to neurological abnormalities, with an 85%  
51 occurrence rate in patients with Alzheimer’s disease [1, 2]. In fact, neurological symptoms, including  
52 hypogeusia, headache and anosmia, precede the onset of respiratory symptoms in the majority of patients  
53 with COVID-19. The major chronic sequelae of COVID-19 are expected to be cognitive decline and  
54 dementia [3]. A recent study has shown that one-third of COVID-19 survivors exhibit substantial  
55 neurological and psychiatric morbidity in the 6 months after SARS-CoV-2 infection [4]. Furthermore, the  
56 “brain disease” risk is not limited to patients who have severe COVID-19 [4]. Thus, the COVID-19  
57 pandemic provides a unique but unwelcomed opportunity to study the contribution of SARS-CoV-2 to  
58 neurological disorders, including Alzheimer’s disease.

59       It has been proposed that  $\beta$ -coronaviruses, including SARS-CoV-2, can invade the central nervous  
60 system [5]. The two coronaviruses closely related to SARS-CoV-2, Middle Eastern respiratory syndrome  
61 coronavirus (MERS-CoV) and severe acute respiratory syndrome coronavirus 1 (SARS-CoV-1), can  
62 infect the central nervous system [6, 7]. A recent study shows the presence of SARS-CoV-2 in a patient’s  
63 olfactory mucosa and its neuronal projections [8]. SARS-CoV-2 RNA is present in 36.4% of brain biopsies  
64 of fatal COVID-19 cases [9]. A recent study observes the presence of SARS-CoV-2 spike protein in some  
65 brain regions in all three COVID-19 cases studied [10]. In transgenic hACE2 mice, SARS-CoV-2 is  
66 massively present in the brain at post infection day 5 [11]. In addition to olfactory transmucosal entry of  
67 SARS-CoV-2 into the central nervous system (CNS) [8], other potential routes of SARS-CoV-2 brain  
68 entry, including blood–brain barrier (BBB) passage, especially under conditions of a compromised BBB,  
69 such as in cases of Alzheimer’s disease and autism [12, 13], and the infiltration of infected immune cells

70 have been proposed [14], though evidence for infected immune cells remains scarce. However,  
71 neurological disorders are not limited to severe COVID-19 cases, suggesting that multiple brain entries  
72 may account for SARS-CoV-2 neurotropism. Although SARS-CoV-2 can enter the brain, experimental  
73 evidence of its presence in key brain regions involved in cognitive functions is still lacking, and little is  
74 known about the functional impact of SARS-CoV-2 CNS invasion on neurons.

75 SARS-CoV-2 entry into host cells is facilitated by its cell surface receptors. The spike proteins of  
76 both SARS-CoV-2 and the earlier SARS-CoV-1 bind to angiotensin-converting enzyme 2 (ACE2) as the  
77 first step of cellular entry [15]. The presence of ACE2 in neurons of the brain has been demonstrated [16].  
78 However, ACE2 is expressed at relatively low levels in most tissues [17]. SARS-CoV-2 exhibits much  
79 higher infectivity than SARS-CoV-1. This evidence implicates either the existence of other cell surface  
80 receptors in SARS-CoV-2 cell entry or the facilitation of cell entry by other factors. Indeed, neuropilin-1  
81 (NRP1) has been identified as a facilitator of SARS-CoV-2 entry when ACE2 is expressed, leading to high  
82 rates of infection [17]. NRP1 effectively binds to the protease furin-cleaved spike protein of SARS-CoV-  
83 2 [17], a process that does not occur for SARS-CoV-1. NRP1 is abundantly expressed in cells of many  
84 tissues including neurons [18]. The presence of ACE2 and NRP1 in neurons suggests the high possibility  
85 of neurotropism. It is of interest to determine in which cell types in the CNS and at which stage of neural  
86 development SARS-CoV-2 can exert its infectibility.

87 There is a profound link between SARS-CoV-2 infection and dementia/Alzheimer's disease. The  
88 2002 and 2012 SARS and MERS epidemics caused memory impairment in many recovered patients [19].  
89 Neurological syndromes related to Alzheimer's disease, including neuroinflammatory syndromes [20, 21],  
90 seizures [22], delirium [23, 24], and alterations in personality, behavior, and cognitive deficits [20, 25],  
91 frequently occur in patients with COVID-19 who recover from COVID-19. Thus, SARS-CoV-2 infection  
92 of the brain may increase the risk of Alzheimer's disease. The direct effects of SARS-CoV-2 on neuronal



93 function and survival, the inflammatory cytokine response, and hypoxia may lead to an Alzheimer's-like  
94 manifestation [26, 27]. Additionally, Alzheimer's patients have twice the risk of contracting COVID-19,  
95 which deteriorates Alzheimer's symptoms and increases mortality [28]. The cellular mechanism  
96 underlying the possible neurotropism of SARS-CoV-2 needs to be revealed for the development of  
97 possible treatments for a large number of COVID-19 survivors suffering from neurological disorders.

98 In this study, we sought to test whether SARS-CoV-2 is neurotropic and infects neural cells in the  
99 cognitive center in five patients with Alzheimer's disease, autism, frontotemporal dementia and no  
100 underlying condition, respectively. SARS-CoV-2 infection alters transcriptomic landscapes in favor of the  
101 development of Alzheimer's-like neuropathology in non-Alzheimer's individuals and exacerbates  
102 Alzheimer's neuropathology in patients with Alzheimer's. We found that SARS-CoV-2 invades the  
103 cognitive centers of all five COVID-19 patients, leading to Alzheimer's-like neuropathology or  
104 Alzheimer's neuropathology exacerbation. SARS-CoV-2 infects human inducible pluripotent stem cell  
105 (iPSC)-derived mature neurons from healthy individuals, leading to amyloid beta ( $A\beta$ ) deposition,  
106 increased inflammation, neuronal death and increased expression of Alzheimer's mediators. Strikingly,  
107 we found that SARS-CoV-2-infects neurons from healthy individuals through a shared gene expression  
108 program with Alzheimer's neurons, leading to activation of the infectious pathways and supporting the  
109 infectious etiology of Alzheimer's disease.

110

## 111 **Results**

### 112 **SARS-CoV-2 invades cognitive centers of the brain**

113           Because ACE2, the SARS-CoV-2 cellular receptor, and NRPI, a facilitator of SARS-CoV-2 entry,  
114 are expressed in CNS neurons, we hypothesized that SARS-CoV-2 can infect neural cells in the brain,  
115 especially under conditions such as Alzheimer's disease and autism with BBB compromise. SARS-CoV-  
116 2 has been observed in cells of olfactory bulbs. We focused on cognitive centers of the brain. The SARS-  
117 CoV-2 spike protein and nucleocapsid protein were detected in cells of the inferior frontal cortexes of five  
118 COVID-19 cases: two autism cases, one Alzheimer's case, one frontotemporal dementia (FTD) case and  
119 one case without any underlying health conditions (apparently healthy case) (Fig. 1, Fig. S1). In contrast,  
120 there was no positive staining of spike protein or nucleocapsid protein in the cortexes of the non-COVID-  
121 19 autism brains (Fig. 1A, C, Fig. S1A). Spike protein- and nucleocapsid protein-positive viral particles  
122 were robustly present in the cytoplasm and cellular projections of cortical cells (Fig. 1E, F). RNAscope *in*  
123 *situ* hybridization detected the abundant presence of SARS-CoV-2 genomic RNA in cortical cells of the  
124 five COVID-19 cases (Fig. 1G, H; Fig. S1F). PCR analysis using the CDC method [29] confirmed the  
125 presence of SARS-CoV-2 RNA in the three cases that had frozen brain tissues (Fig. 1I). In the 31-year-  
126 old COVID-19 autism case, the amounts of SARS-CoV-2 RNA in the inferior frontal cortex and the  
127 dorsolateral prefrontal cortex were comparable to those in the lungs (Fig. 1I). In the COVID-19 FTD case  
128 and the COVID-19 apparently healthy case, SARS-CoV-2 RNA was also detected, whereas there was no  
129 SARS-CoV-2 RNA in the age-matched non-COVID-19 FTD individual or in the age-matched non-  
130 COVID-19 apparently healthy individual (Fig. 1I).

131           Additional analyses showed that cells of the three cortical regions, the entorhinal cortex, the  
132 inferior frontal cortex and the dorsolateral prefrontal cortex, in the two COVID-19 autism cases and the  
133 COVID-19 Alzheimer's case possessed abundant spike protein staining signals (Fig. 1J, K, L). The

134 numbers of SARS-CoV-2 spike protein-positive cells in these three regions were different in these three  
135 COVID-19 cases (Fig. 1J, K, L). These findings demonstrated that SARS-CoV-2 was neurotropic in this  
136 cohort of COVID-19 patients (Table S1).

### 137 **SARS-CoV-2 infects CNS cells expressing ACE2 and NRP1**

138 Because SARS-CoV-2 exists in cortical cells in COVID-19 patients, these cells must express ACE2  
139 and NRP1. Indeed, the SARS-CoV-2 spike protein staining signal was colocalized with both ACE2 and  
140 NRP1 signals (Fig. 2A, B), indicating that SARS-CoV-2 infects cortical cells using these proteins. ACE2  
141 was colocalized with the neuron marker neurofilament light chain (NFL) (Fig. 2C, D), the pan-neuron  
142 marker class III beta-tubulin (Tuj1) (Fig. 2E), the oligodendrocyte marker 2',3'-cyclic nucleotide-3'-  
143 phosphodiesterase (CNPase) (Fig. 2F), and the microglia marker ionized calcium-binding adapter  
144 molecule 1 (Iba1) (Fig. 2G). Quantitative analysis of double ACE2 and cell marker positive cells indicated  
145 that all neurons expressed ACE2 (Fig. 2H). Next, we determined which cell types in the cortexes were  
146 infected by SARS-CoV-2. We used dual immunohistological labeling with antibodies against cell type-  
147 specific markers and the SARS-CoV-2 spike protein. Both the mature neuron marker neuronal nuclear  
148 protein (NeuN) and the pan-neuron marker class III beta-tubulin (Tuj1) were colocalized with the spike  
149 protein in cells of the inferior frontal cortex (Fig. 2I, J). In the same region, both GABAergic inhibitory  
150 neurons (GAD65-positive) and glutamatergic excitatory neurons (glutamine synthetase-positive)  
151 contained SARS-CoV-2 spike protein staining signals (Fig. 2K, L). The SARS-CoV-2 spike protein  
152 staining signal was also present in Iba1-positive microglia and CNPase-positive oligodendrocytes in the  
153 same region (Fig. 2M, N). However, there was no detectable SARS-CoV-2 spike protein staining signal  
154 in glial fibrillary acidic protein (GFAP)-positive astrocytes (Fig. 2O). Quantification of double SARS-  
155 CoV-2 spike protein- and different cell type marker-positive cells indicated that spike protein was present  
156 in all neurons (Fig. 2P). Thus, SARS-CoV-2 infects various CNS cell types. Because infected peripheral

157 immune cells may enter the brain, T and B cells were examined in the inferior frontal cortex. There were  
158 no T, B cell, or macrophage marker staining signals in this region of the COVID-19 autism cases (Fig.  
159 S2). However, a significant number of these immune cells were detected in the COVID-19 Alzheimer's  
160 brain (Fig. S2).

### 161 **SARS-CoV-2 causes cell death via multiple pathways**

162 To determine whether SARS-CoV-2-infected cells in the cortical regions undergo cell death, we used  
163 immunohistological dual labeling with antibodies against the spike protein and cleaved caspase-3. There  
164 was no detectable cleaved caspase 3 staining signal in cells of the inferior frontal cortexes of non-COVID-  
165 19 autism controls (Fig. 3A). Over 90% of cleaved caspase 3-positive cells were SARS-CoV-2 spike  
166 protein positive in the cortexes of two COVID-19 autism cases (Fig. 3A). In the COVID-19 Alzheimer's  
167 disease case, over 20% of cleaved caspase 3-positive cells were SARS-CoV-2 spike protein positive (Fig.  
168 3B). Cleaved caspase 3 was induced in two COVID-19 autism cases and the COVID-19 case without  
169 underlying health conditions and was enhanced in the COVID-19 Alzheimer's case and the COVID-19  
170 FTD case (Fig. S3A, B, C).

171 To further determine the type of programmed cell death, we examined the presence of necroptotic,  
172 ferroptotic, and senescent cells. The cell necroptosis markers phospho-MLKL (mixed lineage kinase  
173 domain-like) and phospho-RIPK3 coexisted in spike protein-positive cells (Fig. 3C, Fig. S3D). Similarly,  
174 the two cell ferroptosis markers TfR1 (transferrin receptor) and ASCL4 (long-chain fatty acyl-CoA  
175 synthetase 4) were expressed in cells with positive spike protein signals (Fig. 3D, Fig. S3E). Because the  
176 cytokine associated with SARS-CoV-2 may trigger the cellular senescence program, we detected the  
177 senescence marker DPP4 (dipeptidyl-peptidase 4) in a subset of spike protein-positive cells (Fig. 3E).  
178 There were negligible double spike protein- and TfR1- or p-RIPK3-positive cells in the COVID-19  
179 Alzheimer's case (Fig. 3D, Fig. S3D). These findings suggest that SARS-CoV-2 leads to cell death and

180 senescence through multiple pathways.

### 181 **SARS-CoV-2 induces neuroinflammation**

182 It has been suggested that SARS-CoV-2 infection leads to neuroinflammation. However, direct  
183 evidence on the link between SARS-CoV-2 and neuroinflammation is still lacking. The protein expression  
184 of two cytokines, IL-1 $\beta$  and IL-6 (interleukin 6), was significantly increased in the cortical cells of  
185 COVID-19 autism patients compared to the cortical cells of non-COVID-19 autism patients (Fig. S4A, B,  
186 C), providing the direct evidence of neuroinflammation induced by SARS-CoV-2.

### 187 **SARS-CoV-2 induces Alzheimer's-like phenotype development and exacerbation**

188 Cellular A $\beta$  (amyloid beta) aggregates were observed in the cortexes of the two COVID-19 autism  
189 cases (Fig. 4A) and the one COVID-19 case without underlying health conditions (Fig. 4B), whereas it  
190 was not present in the cortexes of age-matched non-COVID-19 autism cases and an apparently healthy  
191 individual (Fig. 4A, B). Extracellular A $\beta$  plaques were present in one of the COVID-19 autism cases (Fig.  
192 4A). Immunofluorescence analysis with thioflavin-T confirmed that the cytoplasmic deposition of A $\beta$  in  
193 the COVID-19 autism cases consisted of aggregated A $\beta$  (Fig. 4A). There was more A $\beta$  plaque deposition  
194 per measured area in the cortexes of the COVID-19 Alzheimer's and FTD brains than in the cortexes of  
195 age-matched non-COVID-19 Alzheimer's and FTD brains (Fig. 4C, D). One of the neuropathological  
196 hallmarks of Alzheimer's disease is the development of intracellular neurofibrillary tangles (NFTs)  
197 composed of hyperphosphorylated Tau (microtubule-associated protein tau). p-Tau-containing NFTs are  
198 associated with neuronal dysfunction, cognitive deficits and neuronal death [30, 31]. p-Tau-containing  
199 NFTs were present in the inferior cortexes of the two COVID-19 autism cases (Fig. 4E). Cellular p-Tau  
200 deposition was induced in these two COVID-19 autism cases and the COVID-19 case without underlying  
201 health conditions (Fig. 4E, F), whereas there were no signals or negligible p-Tau staining signals in the  
202 cortexes of non-COVID-19 control brains (Fig. 4E, F). There were significantly higher numbers of Pick

203 bodies in the COVID-19 FTD case than in age-matched non-COVID-19 FTD cases (Fig. 4G, H). Thus,  
204 SARS-CoV-2 infection is linked to Alzheimer's neuropathology.

### 205 **SARS-CoV-2 infects iPSC-derived mature neurons**

206 Based on the above findings in neurons of COVID-19 patients' brain cortexes, we propose that SARS-  
207 CoV-2 can effectively infect neurons. To establish an *in vitro* platform to study this process, we obtained  
208 iPSCs derived from age-matched healthy individuals and Alzheimer's patients and differentiated it into  
209 neurons, followed by SARS-CoV-2 infection. SARS-CoV-2-GFP (in which GFP replaced the viral open  
210 reading frame ORF7a [32]) at a multiplicity of infection (MOI) of 0.1 or 0.2 did not infect any cells at  
211 iPSC neuron differentiation day 35 (Fig. 5A, Fig. S5A) and some of these cells expressed the pan-neuron  
212 marker Tuj1 but did not express the mature neuron marker NeuN (Fig. 5B, Fig. S5B). At iPSC  
213 differentiation day 50, SARS-CoV-2-GFP at an MOI of 0.05, 0.1 or 0.2 effectively infected cells  
214 differentiated from iPSCs from healthy individuals and Alzheimer's patients (Fig. 5C, Fig. S5C, D), and  
215 SARS-CoV-2-GFP could be detected in cell culture media 72 hours post SARS-CoV-2-GFP infection (Fig.  
216 5D), indicating that the virus not only infects cells but also replicates intracellularly. SARS-CoV-2-  
217 infected cells were essentially all Tuj1-positive cells at iPSC differentiation day 50 (Fig. 5E), and no  
218 GFAT-positive astrocytes were detected in mock- and SARS-CoV-2-infected cells (Fig. 5F). At iPSC  
219 differentiation day 35, there was no expression of ACE2 or NRP1 proteins (Fig. 5G, H). At iPSC  
220 differentiation day 50, robust ACE2 and NRP1 protein expression existed in Tuj1-positive neurons (Fig.  
221 5I, J). Over 40% of Tuj1-positive neurons were ACE2- and/or NRP1-positive (Fig. 5I, J). Subsequent  
222 experiments were conducted on iPSC differentiation day 50. These results suggest that SARS-CoV-2  
223 infects mature neurons via ACE2 with the facilitation of NRP1.

### 224 **SARS-CoV-2 induces Alzheimer's phenotypes in iPSC-derived cells**

225 Because SARS-CoV-2 induces A $\beta$  cellular aggregates and extracellular plaques, p-Tau cellular

226 deposition and NFTs and neuroinflammation in COVID-19 patients, we hypothesized that SARS-CoV-2  
227 infection can turn neurons derived from iPSCs from healthy individuals into Alzheimer's-phenotype  
228 neurons. Neurons differentiated from iPSCs of healthy individuals and Alzheimer's patients were infected  
229 with wild-type SARS-CoV-2 (WA-1 strain [33]) at an MOI of 0.1 for 48 hours (Fig. 6, Fig. S6). SARS-  
230 CoV-2 induced cellular A $\beta$  aggregates in healthy neurons and increased cellular A $\beta$  aggregates in  
231 Alzheimer's neurons (Fig. 6A). Cellular p-Tau deposition was induced in healthy neurons after 72 hours  
232 of SARS-CoV-2 infection (Fig. 6B), and the virus further increased cellular p-Tau deposition in  
233 Alzheimer's neurons (Fig. 6B). Compared to their mock-infected counterparts, both healthy neurons and  
234 Alzheimer's neurons had higher levels of major inflammatory cytokines including IL-1 $\beta$ , IL-6, IFN $\gamma$  and  
235 TNF $\alpha$  after SARS-CoV-2 infection (Fig. 6C). Among the critical Alzheimer's mediators, amyloid  
236 precursor protein (APP), enzyme  $\beta$ -secretase 1 (BACE1), and presenilin 1/2 (PSEN1/2), SARS-CoV-2  
237 significantly increased BACE1 expression in healthy neurons and Alzheimer's neurons but did not affect  
238 the expression of the other Alzheimer's mediators (Fig. 6D, E). Likewise, SARS-CoV-2 significantly  
239 increased the number of cleaved caspase 3-positive cells differentiated from iPSCs of healthy individuals  
240 and Alzheimer's patients (Fig. 6F). Thus, SARS-CoV-2 triggers an Alzheimer's-like cellular program in  
241 neurons derived from iPSCs of healthy individuals and enhances Alzheimer's phenotypes in cells derived  
242 from Alzheimer's iPSCs.

### 243 **Alzheimer's infectious etiology genes identified via SARS-CoV-2**

244 Over 95% of Alzheimer's cases are sporadic and their causes are still unclear. Studies of DNA viruses  
245 have shown that Alzheimer's etiology has an infectious component [34, 35]. Based on the above  
246 observation that SARS-CoV-2 induces Alzheimer's phenotypes in neurons derived from iPSCs of healthy  
247 non-Alzheimer's individuals, we aimed to utilize SARS-CoV-2 infection to reveal genes responsible for  
248 the Alzheimer's infectious etiology. The transcriptomes of neurons differentiated from iPSCs of healthy

249 individuals and Alzheimer's patients were determined by RNA sequencing (Fig. 7A-E). Under mock  
250 infection conditions, 553 genes were significantly upregulated, while 71 genes were significantly  
251 downregulated, in Alzheimer's neurons compared to neurons from iPSCs of healthy individuals  
252 (designated healthy neurons) (Fig. 7A). SARS-CoV-2 upregulated 75 genes and downregulated 19 genes  
253 in healthy neurons (Fig. 7B). To extract the genes responsible for Alzheimer's infectious etiology, 24  
254 overlapping genes were identified between the Alzheimer's neuron-mock-infected group and the healthy  
255 neuron-SARS-CoV-2-infected group (Fig. 7D). Pathway analysis revealed that the changes in these 24  
256 genes activated infection pathways elicited by bacteria and viruses (Fig. 7D).

257 Compared to healthy neurons without viral infection, Alzheimer's neurons infected with SARS-CoV-2  
258 had 517 upregulated genes and 256 downregulated genes (Fig. 7C). This number of downregulated genes  
259 (256) was higher than the number of downregulated genes in Alzheimer's neurons (71) (Fig. 7A, C). In  
260 Alzheimer's neurons, SARS-CoV-2 further increased the expression of 25 upregulated genes and  
261 decreased the expression of 34 downregulated genes by several-fold (Fig. S6A), indicating that the virus  
262 deteriorates Alzheimer's conditions, and pathway analysis pointed to the further activation of  
263 neuroinflammation and other processes in Alzheimer's neurons (Fig. S6B).

#### 264 **Top genes in the Alzheimer's infectious etiology transform neurons**

265 The 24 overlapping genes between Alzheimer's neurons without SARS-CoV-2 infection and healthy  
266 neurons infected by SARS-CoV-2 are potential genes involved in the Alzheimer's infectious etiology. To  
267 evaluate whether the top upregulated genes among these 24 genes can turn healthy neurons into  
268 Alzheimer's-like neurons, we overexpressed the top three genes individually, FCGR3, LILRB5 and  
269 OTOR, in human primary neurons from a healthy individual. Overexpression of these genes in healthy  
270 neurons did not trigger cellular A $\beta$  aggregation or cellular p-Tau deposition (Fig. S7D). In contrast, when  
271 the top three downregulated genes in the 24-gene list, GJA8, CryAA2 and PSG6, were individually



272 silenced in healthy human neurons, cellular expression of A $\beta$ 42 and p-Tau, cellular A $\beta$  aggregation and  
273 cellular p-Tau deposition were induced (Fig. 7F, Fig. S7E). Furthermore, silencing these top three  
274 downregulated genes simultaneously in healthy human neurons robustly triggered cellular A $\beta$  aggregation  
275 and cellular p-Tau deposition (Fig. 7G). Thus, silencing the top three downregulated genes reprogrammed  
276 healthy human neurons into Alzheimer's-like neurons.  
277

## 278 **Discussion**

279       Although it is still controversial whether SARS-CoV-2 invades patients' brains [10, 36], we provide  
280 strong evidence that SARS-CoV-2 can invade the cognitive centers of the brain, leading to Alzheimer's-  
281 like phenotypes and exacerbation of Alzheimer's neuropathology. Examination revealed that iPSC-  
282 derived neurons infected by SARS-CoV-2 recapitulated the key aspects related to clinically observed  
283 neurological disorders in COVID-19 patients and survivors: neurotropism and Alzheimer's induction or  
284 enhancement by SARS-CoV-2.

285       Our observations from both COVID-19 autism and Alzheimer's brains support the effective  
286 infection of neurons, oligodendrocytes and other brain cells by SARS-CoV-2. Thus, the present study  
287 demonstrates the neurotropism of SARS-CoV-2. Such neurotropism has long been known to occur for  
288 other types of human respiratory coronaviruses [37]. Consistent with the current findings, in human iPSC-  
289 derived brain sphere neurons, SARS-CoV-2 at a dose equivalent to that in the present study has been found  
290 to not only infect neurons but also replicate itself in these neurons [38]. SARS-CoV-2 viral particles are  
291 present in both neuronal cell bodies and neurites [38]. SARS-CoV-2 can effectively infect cortical-like  
292 neurons in iPSC-derived brain organoids and these neurons express the SARS-CoV-2 receptor ACE2 and  
293 key coronavirus entry-associated proteases [39]. Regarding the infectibility of human brains by SARS-  
294 CoV-2, viral RNA has been detected in 36.4% of brain biopsies of fatal COVID-19 cases [9], suggesting  
295 that SARS-CoV-2 invades some COVID-19 patients' brains but may not invade all patients' brains. The  
296 current study examined cortical neurons of the brains of COVID-19 patients with either autism or  
297 Alzheimer's disease and observed full infectibility by SARS-CoV-2 in all cases. Similarly, a recent study  
298 using spike protein staining demonstrated that SARS-CoV-2 was present in some brain regions in all three  
299 COVID-19 cases studied [10]. Using multiple approaches, we showed the presence of spike and  
300 nucleocapsid proteins and SARS-CoV-2 viral particles in the cortical regions of all three COVID-19 cases

301 with either autism or Alzheimer's.

302 An early study showed no evidence of SARS-CoV-2 infection of neurons [40]. In iPSC-derived  
303 brain organoids, SARS-CoV-2 infects only mature choroid plexus cells, not neurons or glial cells [40].  
304 This discrepancy may be due to the different developmental stages of neurons. We show that iPSC-derived  
305 immature neurons do not express ACE2 and NPR1 and thus are not able to be infected by SARS-CoV-2,  
306 whereas mature neurons do express these two SARS-CoV-2 receptors and are infected by this virus.  
307 Pellegrini et al. [40] did not observe ACE2 expression in neurons. In COVID-19 patients, not all neurons  
308 are infected by SARS-CoV-2 [10], suggesting that different types of neurons have differential expression  
309 of ACE2 and other SARS-CoV-2 entry factors and variable SARS-CoV-2 infectability. We and others [10]  
310 have shown that cortical neurons including excitatory and inhibitory neurons, are able to be infected by  
311 SARS-CoV-2.

312 SARS-CoV-2 enters hosts through their noses, mouths and eyes; thus, the anatomical proximity  
313 between the nasal cavity/nasopharynx and the olfactory mucosa may enable olfactory transmucosal entry  
314 of SARS-CoV-2 into the CNS [8]. The other major CNS entry route may depend on BBB leakage in  
315 conditions of autism and Alzheimer's disease [12, 13]. This may have been the case in our study, in which  
316 three COVID-19 patients had either autism or Alzheimer's disease. The BBB entry route is supported by  
317 a direct observation of BBB damage in COVID-19 patients [41]. Furthermore, the SARS-CoV-2 spike  
318 protein can disrupt human BBB integrity in 3D microfluidic *in-vitro* models [42]. The infiltration of  
319 infected immune cells into the brain has been proposed as a potential CNS entry route [14]. In agreement  
320 with a prior report, no sign of infected immune cell infiltration into COVID-19 autism patients' brains was  
321 found in the present study. Immune cells were present in the cortex in the COVID-19 Alzheimer's case.  
322 Thus, BBB leakage may be the major CNS entry route for SARS-CoV-2 into autism brains.

323 Apoptotic cell death is observed in the cells of brain organoids infected with SARS-CoV-2 [10, 39,

324 43, 44]. SARS-CoV-2-infected cells may not be very susceptible to apoptosis because the majority of cells  
325 undergoing apoptosis are noninfected but adjacent to SARS-CoV-2-positive cells [10]. The causes of  
326 apoptosis may be SARS-CoV-2-induced cellular inflammation and hypoxia, which occur in brain  
327 organoids infected by this virus [10, 43]. In COVID-19 patients, we found that apoptosis mostly occurred  
328 in cells infected by SARS-CoV-2. We found that cellular inflammation was induced in both iPSC-derived  
329 neurons and COVID-19 patient cortexes, suggesting that cellular inflammation is the primary factor  
330 leading to cell death. Other factors such as p-Tau, as detected by our group and others [44], may also play  
331 important roles in defining cell fates. SARS-CoV-2 infection induces not only apoptosis but also other  
332 nonapoptotic cell death programs, such as necroptosis and ferroptosis, as well as senescence [45], as  
333 observed in the current study. Thus, SARS-CoV-2 infection alters cellular programs, leading to critical  
334 cell mass loss and cellular dysfunction.

335 COVID-19 patients and survivors experience Alzheimer's-like neural syndrome including  
336 memory loss, delirium and cognitive deficits [25], suggesting that there is a cellular mechanism underlying  
337 these phenomena. A prior study showed altered distribution of Tau from axons to soma and Tau  
338 hyperphosphorylation in neurons of brain organoids exposed to SARS-CoV-2 [44]. We observed p-Tau  
339 tangles in the cortexes of two young autism COVID-19 patients, suggesting that neurodegenerative  
340 characteristics manifest in COVID-19 patients' brains. A $\beta$  deposition and neuroinflammation were also  
341 present in the cognitive centers of these two young autism COVID-19 patients and in iPSC-derived  
342 neurons infected by SARS-CoV-2. These observations potentially explain the Alzheimer's-like brain  
343 disease observed in individuals exposed to SARS-CoV-2.

344 The pathogenesis of Alzheimer's disease contains an element of infectious disease pathogenesis.  
345 Pathogen infections can lead to the onset and progression of Alzheimer's disease. Insertions of viral DNA  
346 genomes into spontaneous late-onset Alzheimer's patient genomes have been determined [34]. Viral DNA

347 insertions in the host genome correlate with the induction of critical Alzheimer's mediators, such as  
348 enzymes involved in A $\beta$  species production, aggregation and plaque formation [34]. Direct evidence for  
349 the involvement of viral DNA in Alzheimer's pathogenesis comes from the demonstration that herpes  
350 simplex virus type I (HSV-1) induces multicellular amyloid plaque-like structure formation, gliosis, and  
351 neuroinflammation in iPSC-derived neural cells and a 3D human brain-like model [35]. We provide direct  
352 evidence that the COVID-19 pandemic-causing virus SARS-CoV-2 triggers an Alzheimer's-like  
353 molecular program involving a group of 24 genes related to infectious disease pathway activation. The  $\beta$ -  
354 secretase BACE1, which produces all monomeric forms of amyloid- $\beta$  (A $\beta$ ), including A $\beta$ 42, was induced  
355 by SARS-CoV-2 in iPSC-derived neurons from healthy individuals; thus, BACE1 may be a primary driver  
356 of the Alzheimer's-like phenotypes induced by SARS-CoV-2. SARS-CoV-2-induced hypoxia [10] may  
357 be responsible for BACE1 induction because hypoxia facilitates Alzheimer's pathogenesis by inducing  
358 BACE1 expression [46]. Because 26 of the 29 SARS-CoV-2 proteins physically associate with many  
359 proteins in human cells [47], it is also possible that one or some of the 29 SARS-CoV-2 proteins interact  
360 with transcriptional regulators in host cells, leading to BACE1 upregulation. The mechanism underlying  
361 SARS-CoV-2-induced Alzheimer's-like phenotypes needs to be further investigated.

362 In summary, we found that SARS-CoV-2 neurotropism exhibited full penetrance in the cortexes  
363 of COVID-19 autism and Alzheimer's patients. SARS-CoV-2 infection induced Alzheimer's-like  
364 phenotypes in autism patients and exacerbated neuropathology in Alzheimer's patients. SARS-CoV-2  
365 infection triggered cellular and molecular Alzheimer's pathogenesis programs in iPSC-derived neurons  
366 from healthy individuals and enhanced neuropathological phenotypes in iPSC-derived neurons from  
367 Alzheimer's patients. We reveal a list of 24 genes that potentially mediate the infectious etiology of  
368 Alzheimer's disease under the condition of SARS-CoV-2 infection.

369

370 **Acknowledgments**

371 This work was supported by NIH grants R01HD100195, R01HD102206, R01HD099843, R01DK083243,  
372 R01DK101972, R01HL131737, R01HL134368, R01HL139060, R01DK103024 and P30-AG062429. No  
373 potential conflicts of interest relevant to this article are reported. The authors thank Jeffrey Metcalf, Sara  
374 Shuldberg and Sophia Perrott from the Rissman lab and UCSD Shiley-Marcos ADRC for technical  
375 assistance with this project.

376

377 **Author Contributions**

378 Shen WB, Penghua Yang, Montasir M, Xu C, Logue J, and Baracco L researched the data. Frieman  
379 M, Reece EA, Blanchard T, Li L, Han Z, and Rissman R analyzed the data and revised the manuscript.  
380 Peixin Yang conceived the project, designed the experiments, and wrote the manuscript. All authors  
381 approved the final version of the paper.

382

383 **Declaration of Interests**

384 The authors declare no competing interests.

385

386 **Main figure titles and legends**

387 **Figure 1. SARS-CoV-2 is present in cortical cells in COVID-19 patients.**

388 Representative images of SARS-CoV-2 spike protein staining in the inferior frontal cortexes of an age-  
389 matched non-COVID-19 autism (ASD) case (A) and a COVID-19 autism case (ID #6437) (B).

390 Representative images of SARS-CoV-2 nucleocapsid protein in the inferior frontal cortexes of an age-  
391 matched non-COVID-19 autism case (C) and a COVID-19 autism case (ID #6437) (D).

392 High-magnification imaging indicated that spike protein-positive (E) or nucleocapsid protein-positive (F)  
393 viral particles were located in both the cytoplasm and cellular processes (arrows).

394 SARS-CoV-2 genomic RNA was detected by RNAscope in the cortical cells of the COVID-19 autism  
395 case (H, arrows) but not in the age-matched non-COVID-19 autism case (G).

396 COVID-19 PCR test revealed SARS-CoV-2 positivity in brain regions of two COVID-19 cases along with  
397 lung positivity (ID #6436) (I). Red \* indicates nonspecific bands compared to the 72 bp positive band.

398 Melt curve analysis and DNA sequencing of PCR products confirmed SARS-CoV-2 positivity in brain  
399 tissues.

400 SARS-CoV-2 spike protein staining positivity in the EC, IFC and DPC in the COVID-19 Alzheimer's case  
401 (ID #6435) (J) and in COVID-19 autism case 1 (ID #6436) (K) and case 2 (ID #6437) (L). The spike

402 protein-positive cells per mm<sup>2</sup> were quantified in the three brain regions. Cells were counted from at least  
403 3 sections (n ≥ 3). EC: Entorhinal cortex; IFC: inferior frontal cortex; DPC: dorsolateral prefrontal cortex.

404 Scale bars: A-D, J-L = 20 μm; E, F = 10 μm; G, H = 5 μm. \* indicate significant difference (P < 0.05) by  
405 one-way ANOVA and *Tukey* test.

406 **Figure 2. hACE2-positive or neuropilin 1 (NRP1)-positive neurons and nonneuronal cells exhibit**  
407 **SARS-CoV-2 positivity.**

408 (A) Double spike protein (SP, Ni-DAB: black signals)- and hACE2 (AP staining: red signals)-positive

409 cells in the inferior frontal cortexes (IFCs) of the COVID-19 autism cases, the COVID-19 Alzheimer's  
410 case and their age-matched control cases: non-COVID-19 autism control cases and non-COVID-19  
411 Alzheimer's cases. The graphs show the percentages of double positive cells among total hACE2 positive  
412 cells in  $n \geq 5$  random fields.

413 **(B)** Double SP (Ni-DAB: black signals)- and NRP1 (AP staining: red signals)-positive cells in the inferior  
414 frontal cortexes of the COVID-19 autism cases, the COVID-19 Alzheimer's case and their age-matched  
415 control cases. The graphs show the percentages of double positive cells among total NRP1-positive cells  
416 in  $n \geq 5$  random fields.

417 **(C)** Controls for immunohistological staining with normal IgG for Ni-DAB staining, AP staining or both  
418 in the inferior frontal cortexes (IFCs) of non-COVID-19 autism cases and with an hACE2 antibody for  
419 Ni-DAB staining.

420 Detection of the hACE2 receptor in neurons and nonneuronal cells in the IFCs of non-COVID-19 autism  
421 cases. The hACE2-positive neurons are labeled with antibodies against NFL **(D)** or Tuj1 **(E)**, the  
422 oligodendrocyte marker CNPase **(F)**, and the microglial marker Iba1 **(G)**.

423 **(H)** hACE2 and cell marker double-positive cells were quantified (% ,  $n \geq 5$  random fields).

424 SP positivity was detected in neurons and nonneuronal cells in the IFCs of the COVID-19 autism case (ID  
425 #6437). SP-positive neurons labeled with Tuj1 **(I)**, NeuN **(J)**, the GABAergic inhibitory neuronal marker  
426 GAD65 **(K)**, the glutamatergic excitatory neuronal marker GS (glutamine synthetase) **(L)**, the  
427 oligodendrocyte marker CNPase **(M)**, and the microglial marker Iba1 **(N)**. GFAP<sup>+</sup> astrocytes were SP  
428 negative (green arrows) **(O)**.

429 **(P)** Quantification of SP and cell marker double positive cells (% ,  $n \geq 5$  random fields).

430 AD: Alzheimer's disease; ASD: autism. Scale bar = 20  $\mu$ m. In A and B, \* indicate significant difference  
431 ( $P < 0.05$ ) by *t* test.



432 **Figure 3. Spike protein-positive cells undergo programmed cell death.**

433 Representative images of double SARS-CoV-2 spike protein (SP) (Ni-DAB staining: black signal) and  
434 cleaved caspase 3 (cl-casp3; AP: red signal) staining in the cortexes of age-matched non-COVID-19  
435 autism and COVID-19 autism cases (A) and non-COVID-19 Alzheimer's and the COVID-19 Alzheimer's  
436 case (B). The inset boxes show cl-casp3 and SP double-labeled cells, cl-casp3-positive cells and double-  
437 negative cells.

438 The graphs show the percentages of double SP<sup>+</sup> and cl-casp3<sup>+</sup> cells among total cleaved caspase 3<sup>+</sup> cells  
439 in at least 5 random fields. \* indicate significant difference ( $P < 0.05$ ) compared with the non-COVID-19  
440 controls by *t* test.

441 Representative images of SP staining with the necroptosis marker phospho-MLKL (C), the ferroptosis  
442 marker TfR1 (D), and the senescence marker DPP4 (E) in the cortexes of the non-COVID-19 autism cases,  
443 the COVID-19 Alzheimer's case and the two COVID-19 autism cases. Black arrows point to the double  
444 SP<sup>+</sup> and cl-casp3<sup>+</sup> cells.

445 The graphs show the percentages of SP<sup>+</sup> necroptotic cells, ferroptotic cells and senescent cells counted  
446 from at least 5 random fields ( $n \geq 5$ , in 2 COVID-19 ASD cases and 1 COVID-19 AD case). \* indicate  
447 significant difference ( $P < 0.05$ ) compared with the non-COVID-19 controls by one-way ANOVA and  
448 *Tukey* test. Scale bars = 20  $\mu\text{m}$ .

449

450 **Figure 4. SARS-CoV-2 infection induces or enhances A $\beta$  aggregate/plaque and p-Tau pretangles**  
451 **formation.**

452 A $\beta$  immunohistochemical staining (with the anti-A $\beta$  antibody 6E10) in three cortical regions of two cases  
453 of COVID-19 autism (A) and one case of COVID-19 with no underlying conditions (NUC) (B) and their  
454 age-matched control cases. Cytoplasmic deposition of A $\beta$  (blue arrows) was observed in COVID-19

455 autism (ASD) cortexes, and A $\beta$  plaques (red arrow) were observed in the EC of one COVID-19 ASD case.  
456 Immunofluorescence analysis with thioflavin-T indicated that the cytoplasmic deposits of A $\beta$  in the  
457 COVID-19 autism cortex consisted of aggregated A $\beta$  (inset in **A**, upper panel most right). (**C**) A $\beta$   
458 immunohistochemical staining in the cortical regions and hippocampi of the COVID-19 FTD and  
459 Alzheimer's disease cases, and their age-matched controls. (**D**) Quantification of cellular A $\beta$  aggregates  
460 in ASD and NUC cases or A $\beta$  plaques per mm<sup>2</sup> in FTD and AD cases (3 sections for each region and 3  
461 independent images for one section). (**E**) p-Tau (pSer202) staining in the cortexes of COVID-19 ASD (**E**)  
462 and COVID-19 NUC (**F**) cases and their age-matched controls. (**G**) p-Tau staining in the cortexes and  
463 hippocampi of the two COVID-19 FTD and Alzheimer's disease cases and their age-matched controls.  
464 (**H**) Quantification of cellular p-Tau deposition per mm<sup>2</sup> (3 sections for each region and 3 independent  
465 images for one section). The two COVID-19 ASD cases showed p-Tau pretangle-like structures (indicated  
466 by red arrows) and cytoplasmic p-Tau deposition (indicated by blue arrows). Increased/elevated Pick body  
467 (red arrows) deposition was observed in the COVID-19 FTD case, and there were no differences in p-Tau  
468 tangle numbers in AD cases. Entorhinal cortex: EC; inferior frontal cortex: IFC; dorsolateral prefrontal  
469 cortex: DPC. Significant *P*-values are indicated (by Mann-Whitney U test after confirming a normal  
470 distribution). Bars = 100  $\mu$ m.

471 **Figure 5. SARS-CoV-2 infects mature neurons derived from human iPSCs.**

472 (**A**). SARS-CoV-2-GFP does not infect immature neurons at iPSC neuron differentiation day 35 (n = 3  
473 replicates).

474 (**B**). Immature neurons do not express the mature neuron marker, NeuN.

475 (**C**). SARS-CoV-2 infects mature neurons at iPSC neuron differentiation day 50 (n = 3).

476 (**D**). Detection of SARS-CoV-2 in the culture medium of infected neurons (n = 3).

477 (**E**). SARS-CoV-2 infects Tuj1-positive neurons (n = 3).

478 (F). GFAP is not expressed in SARS-CoV-2-infected cells at iPSC differentiation day 50 (n = 2).

479 Immature Tuj1-positive neurons do not express ACE2 (G) and NRP1 (H) (n = 3).

480 Mature Tuj1 positive neurons express ACE2 (I) and NRP1 (J) (n = 3).

481 The bar graphs show the percentages of double Tuj1- and ACE2- or NRP1-positive cells (yellow) among  
482 total Tuj1<sup>+</sup> cells (green) (n = 3). AD: Alzheimer's disease; CTL: control group (non-AD); ACE2:  
483 angiotensin-converting enzyme 2; Tuj1: beta-Tubulin III; NRP1: Neuropilin 1; SPIKE: SARS-CoV-2  
484 spike protein.

485 **Figure 6. SARS-CoV-2 induces or enhances Alzheimer's-like neuron phenotypes.**

486 (A). SARS-CoV-2 induces cellular A $\beta$  aggregation in neurons derived from iPSCs of healthy individuals  
487 and Alzheimer's patients (n = 3 iPSC lines).

488 (B). SARS-CoV-2 induces cellular p-Tau deposition in neurons derived from iPSCs of healthy individuals  
489 and Alzheimer's patients (n = 3 iPSC lines).

490 The values in the graphs are presented as the means  $\pm$  SEMs (n = 5 images from 2 independent experiments  
491 for each group). The A $\beta$  and p-Tau intensity data were analyzed by Mann-Whitney U test after confirming  
492 a normal distribution. Bars = 50  $\mu$ m.

493 mRNAs levels of inflammatory cytokines (C), BACE1 (D), and Alzheimer's molecular mediators (APP,  
494 PSEN1 and PSEN2) (E) in SARS-CoV-2-infected neurons derived from iPSCs (n = 6, 3 iPSC lines for 2  
495 independent experiments).

496 F. Cleaved caspase 3 (c-Cas3)-positive cells in SARS-CoV-2 infected neurons derived from iPSCs (n = 6  
497 iPSC lines for 2 independent experiments). The bar graph shows the quantification of c-Cas3-positive cell  
498 numbers. CTL: control group (iPSCs from healthy individuals); AD: Alzheimer's disease; CTLv: SARS-  
499 CoV-2-infected control group; ADv: SARS-CoV-2-infected AD group; Tuj1: beta-Tubulin III; c-Cas3,  
500 cleaved caspase 3. Data were analyzed by Mann-Whitney U test after confirming a normal distribution,

501 significant *P*-values are presented.

502 **Figure 7. Identification of an infectious etiology gene signature for Alzheimer's disease.**

503 (A). Volcano plot of differentially expressed genes (DEGs) in neurons derived from iPSCs of patients with  
504 Alzheimer's disease (AD) (the AD group) compared to neurons derived from iPSCs of healthy individuals  
505 (the CTL group).

506 (B). Volcano plot of DEGs in healthy individual iPSC-derived neurons infected with SARS-CoV-2 (the  
507 CTL\_V group) compared to the CTL group.

508 (C). Volcano plot of DEGs in AD neurons infected with SARS-CoV-2 (the AD\_V group) compared to the  
509 CTL group.

510 (D). Venn plot and KEGG pathway analysis for DEGs between the AD group and the CTL\_V group. The  
511 CTL group served as the baseline group. The twenty-four overlapping genes constituted the AD infectious  
512 etiology gene signature.

513 (E). Venn plot and KEGG pathway analysis for DEGs between the AD group and the AD\_V group. The  
514 CTL group served as the baseline group.

515 For A to E, *n* = 3 iPSC lines for the CTL and AD groups.

516 (F-G). Analysis of the effect of siRNA mediated individual or combined knockdown of the top 3  
517 downregulated genes, GJA8, CryAA2 and PSG6, on the AD infectious etiology gene signature in primary  
518 human neurons. F: Immunoblot analysis of A $\beta$  isoforms (*n* = 3 replicates). G. Cellular A $\beta$  aggregation  
519 (left panel) and cellular p-Tau deposition (right panel). A $\beta$  aggregates and p-Tau accumulation in the  
520 cytoplasm or neuronal axon are indicated by white arrowheads. The values in the graphs are presented as  
521 the means  $\pm$  SEMs (*n* = 8 images from 3 replicates). Intensity data were analyzed by Mann-Whitney U  
522 test after confirming a normal distribution, significant *P*-values are presented. Scale bar, 50  $\mu$ m.

523

524 **Supplemental figure titles and legends**

525 **Fig. S1. Presence of SARS-CoV-2 spike protein in cortical cells of five COVID-19 cases.**

526 Spike protein staining signals were visualized with an alkaline phosphatase (AP)-coupled goat anti-rabbit  
527 secondary antibody and AP red substrate. SARS-CoV-2 spike protein red signals were located in the  
528 cytosol of cortical cells of one COVID-19 autism (ASD) case but not in cells of an age-matched non-  
529 COVID-19 ASD control (**A**). Spike protein (DAB staining, brown signal; counterstained with hematoxylin,  
530 blue) was present in the cytosol of cortical cells of the COVID-19 FTD case (ID #5922) (**C**, three different  
531 fields, arrows) but not in those of the age-matched non-COVID-19 FTD controls (**B**, 3 cases). In the  
532 COVID-19 case without underlying conditions (ID #5932), the spike protein was also visible (**E**, three  
533 different fields, arrows), but it was not visible in the age-matched non-COVID-19 AD controls (**D**, 3 cases).  
534 RNAscope *in situ* hybridization showing COVID-19 genomic RNAs in four COVID-19 cases (**F**): 2 ASD  
535 COVID-19 cases, 1 AD COVID-19 case, 1 FTD COVID-19 case, and 1 COVID-19 case without  
536 underlying conditions. Scale bar = 20  $\mu\text{m}$ .

537

538 **Fig. S2. Immunostaining of immune cell markers in brain tissues of COVID-19 patients.**

539 Immunolabeling (DAB, brown signal) with antibodies against CD3 (T cell marker, **A**), CD20 (B cell  
540 marker, **B**), and F4/80 (macrophage marker, **C**) showed positively labeled immune cells in the cortex of  
541 the COVID-19 Alzheimer's case. Immune cells were not detected in non-COVID-19 autism cases or the  
542 two COVID-19 autism cases (**A-C**). Counterstaining: hematoxylin. The arrows point to immune cells. (**D**)  
543 The percentages of immune cells were quantified from 3 sections ( $n = 3$ ). \* indicates a significant  
544 difference ( $P < 0.05$ ) by one-way ANOVA and Tukey's test. Scale bar = 20  $\mu\text{m}$ .

545

546 **Fig. S3. Programmed cell death in SARS-CoV-2 spike protein positive-cortical cells.**

547 Representative images of cleaved caspase-3 staining (DAB, brown signal) in the cortexes of age-matched

548 non-COVID-19 autism cases, 2 COVID-19 autism cases, and 1 COVID-19 case with no underlying  
549 conditions (A). Cleaved caspase-3-positive cells in the non-COVID-19 Alzheimer's, COVID-19  
550 Alzheimer's, non-COVID-19 FTD, and COVID-19 FTD cases (B). Counterstaining: hematoxylin (blue).  
551 (C) Quantification of cleaved caspase-3<sup>+</sup> cells in at least 5 random fields ( $n \geq 5$ , in 2 autism cases, 1 AD  
552 case, 1 FTD case and 1 case without underlying conditions). The arrows point to cleaved caspase-3<sup>+</sup> (cl-  
553 casp-3<sup>+</sup>) cells. Representative images of spike protein-positive signals (black dots) with p-Ripk3<sup>+</sup>  
554 necroptotic cells (D) and ASCL4<sup>+</sup> ferroptotic cells (E) in the non-COVID-19, COVID-19 Alzheimer's  
555 (AD), and COVID-19 autism (ASD) cases. The arrows point to the double-positive cells. Quantification  
556 of double-positive cell numbers (spike protein and programmed cell death marker positive) from at least  
557 5 random fields ( $n \geq 5$ ). \* indicates a significant difference ( $P < 0.05$ ) compared with non-COVID-19  
558 controls by one-way ANOVA and *Tukey's* test. Scale bar = 20  $\mu\text{m}$ .

559

560 **Figure. S4. Cytokine expression in COVID-19 autism cortexes.**

561 Representative images of immunostaining of the cytokines IL-1 $\beta$  (A) and IL-6 (B) in the two cases of  
562 COVID-19 autism (ASD) and in age-matched non-COVID-19 ASD controls (CTL) in the entorhinal  
563 cortex (EC). (C) Quantification of immunostaining intensity ( $n = 6$ , 3 random fields per case per region).  
564 Data were analyzed by Mann-Whitney U test after confirming a normal distribution, a significant *P*-value  
565 is presented. Scale bar = 100  $\mu\text{m}$ .

566

567 **Fig. S5. SARS-CoV-2 infects mature neurons derived from human iPSCs.**

568 (A) SARS-CoV-2-GFP does not infect immature neurons at iPSC differentiation day 35. White asterisks  
569 (\*) indicate nonspecific fluorescent signals. (B) Immature neurons do not express the mature neuron  
570 marker NeuN. (C). SARS-CoV-2 infects mature neurons at iPSC differentiation day 50. (D). SARS-CoV-  
571 2-GFP infects mature neurons at different dosages. CTL (non-AD: iPSCs derived from healthy

572 individuals): control groups; AD: Alzheimer's disease; Tuj1: beta-Tubulin III; SPIKE: SARS-CoV-2 spike  
573 protein.

574

575 **Fig. S6. Effects of identified Alzheimer's infectious etiology genes on A $\beta$  and p-Tau in human**

576 **primary neurons. (A).** Upregulated genes in AD neurons that were further upregulated due to SARS-

577 CoV-2 infection. **(B).** Downregulated genes in AD neurons that were further downregulated due to SARS-

578 CoV-2. **(C).** KEGG pathway analysis of the upregulated and downregulated genes in AD neurons that

579 were further upregulated and downregulated by SARS-CoV-2. CTL (non-AD: iPSCs derived from healthy

580 individuals): control groups; AD: Alzheimer's disease; ADV: SARS-CoV-2-infected AD group. For each

581 group, n = 3.

582 **(D)** Immunofluorescence staining with the indicated antibodies after lentivirus-mediated overexpression

583 of the top 3 upregulated genes, FCGR, LILRB5 and OTOR, identified in Fig. 7D as AD infectious etiology

584 genes. Combined or individual overexpression of these three genes did not induce A $\beta$  cellular aggregation,

585 and only FCGR overexpression increased Tau phosphorylation at Ser202.

586 **(E)** Immunofluorescence staining of the indicated antibodies after siRNA-mediated knockdown of the top

587 3 downregulated genes, GJA8, CryAA2 and PSG6, identified in Fig. 7D as AD infectious etiology genes.

588 Knockdown of GJA8, CryAA2 or PSG6 individually caused A $\beta$  cellular aggregation and significantly

589 increased Tau phosphorylation at Ser202.

590

## 591 **References**

- 592 [1] Helms J, Kremer S, Merdji H, Clere-Jehl R, Schenck M, Kummerlen C, et al. Neurologic Features in Severe SARS-CoV-2  
593 Infection. *N Engl J Med*. 2020;382:2268-70.
- 594 [2] Mao L, Jin H, Wang M, Hu Y, Chen S, He Q, et al. Neurologic Manifestations of Hospitalized Patients With Coronavirus  
595 Disease 2019 in Wuhan, China. *JAMA Neurol*. 2020;77:683-90.
- 596 [3] de Erausquin GA, Snyder H, Carrillo M, Hosseini AA, Brugha TS, Seshadri S, et al. The chronic neuropsychiatric sequelae  
597 of COVID-19: The need for a prospective study of viral impact on brain functioning. *Alzheimers Dement*. 2021.
- 598 [4] Taquet M, Geddes JR, Husain M, Luciano S, Harrison PJ. 6-month neurological and psychiatric outcomes in 236 379  
599 survivors of COVID-19: a retrospective cohort study using electronic health records. *Lancet Psychiatry*. 2021;8:416-27.
- 600 [5] De Santis G. SARS-CoV-2: A new virus but a familiar inflammation brain pattern. *Brain Behav Immun*. 2020;87:95-6.
- 601 [6] Li K, Wohlford-Lenane C, Perlman S, Zhao J, Jewell AK, Reznikov LR, et al. Middle East Respiratory Syndrome  
602 Coronavirus Causes Multiple Organ Damage and Lethal Disease in Mice Transgenic for Human Dipeptidyl Peptidase 4. *J*  
603 *Infect Dis*. 2016;213:712-22.
- 604 [7] Netland J, Meyerholz DK, Moore S, Cassell M, Perlman S. Severe acute respiratory syndrome coronavirus infection causes  
605 neuronal death in the absence of encephalitis in mice transgenic for human ACE2. *J Virol*. 2008;82:7264-75.
- 606 [8] Meinhardt J, Radke J, Dittmayer C, Franz J, Thomas C, Mothes R, et al. Olfactory transmucosal SARS-CoV-2 invasion as  
607 a port of central nervous system entry in individuals with COVID-19. *Nat Neurosci*. 2021;24:168-75.
- 608 [9] Puelles VG, Lutgehetmann M, Lindenmeyer MT, Sperhake JP, Wong MN, Allweiss L, et al. Multiorgan and Renal Tropism  
609 of SARS-CoV-2. *N Engl J Med*. 2020;383:590-2.
- 610 [10] Song E, Zhang C, Israelow B, Lu-Culligan A, Prado AV, Skriabine S, et al. Neuroinvasion of SARS-CoV-2 in human and  
611 mouse brain. *J Exp Med*. 2021;218.
- 612 [11] Zheng J, Wong LR, Li K, Verma AK, Ortiz ME, Wohlford-Lenane C, et al. COVID-19 treatments and pathogenesis  
613 including anosmia in K18-hACE2 mice. *Nature*. 2021;589:603-7.
- 614 [12] Montagne A, Zhao Z, Zlokovic BV. Alzheimer's disease: A matter of blood-brain barrier dysfunction? *J Exp Med*.  
615 2017;214:3151-69.
- 616 [13] Fiorentino M, Sapone A, Senger S, Camhi SS, Kadzielski SM, Buie TM, et al. Blood-brain barrier and intestinal epithelial  
617 barrier alterations in autism spectrum disorders. *Mol Autism*. 2016;7:49.
- 618 [14] Iadecola C, Anrather J, Kamel H. Effects of COVID-19 on the Nervous System. *Cell*. 2020;183:16-27 e1.
- 619 [15] Hoffmann M, Kleine-Weber H, Schroeder S, Kruger N, Herrler T, Erichsen S, et al. SARS-CoV-2 Cell Entry Depends on  
620 ACE2 and TMPRSS2 and Is Blocked by a Clinically Proven Protease Inhibitor. *Cell*. 2020;181:271-80 e8.
- 621 [16] Butowt R, Bilinska K. SARS-CoV-2: Olfaction, Brain Infection, and the Urgent Need for Clinical Samples Allowing  
622 Earlier Virus Detection. *ACS Chem Neurosci*. 2020;11:1200-3.
- 623 [17] Cantuti-Castelvetri L, Ojha R, Pedro LD, Djannatian M, Franz J, Kuivanen S, et al. Neuropilin-1 facilitates SARS-CoV-2  
624 cell entry and infectivity. *Science*. 2020;370:856-60.
- 625 [18] Vanacker C, Trova S, Shruti S, Casoni F, Messina A, Croizier S, et al. Neuropilin-1 expression in GnRH neurons regulates  
626 prepubertal weight gain and sexual attraction. *EMBO J*. 2020;39:e104633.
- 627 [19] Rogers JP, Chesney E, Oliver D, Pollak TA, McGuire P, Fusar-Poli P, et al. Psychiatric and neuropsychiatric presentations  
628 associated with severe coronavirus infections: a systematic review and meta-analysis with comparison to the COVID-19  
629 pandemic. *Lancet Psychiatry*. 2020;7:611-27.
- 630 [20] Varatharaj A, Thomas N, Ellul MA, Davies NWS, Pollak TA, Tenorio EL, et al. Neurological and neuropsychiatric  
631 complications of COVID-19 in 153 patients: a UK-wide surveillance study. *Lancet Psychiatry*. 2020;7:875-82.
- 632 [21] Paterson RW, Brown RL, Benjamin L, Nortley R, Wiethoff S, Bharucha T, et al. The emerging spectrum of COVID-19  
633 neurology: clinical, radiological and laboratory findings. *Brain*. 2020;143:3104-20.
- 634 [22] Kadono Y, Nakamura Y, Ogawa Y, Yamamoto S, Kajikawa R, Nakajima Y, et al. A case of COVID-19 infection presenting  
635 with a seizure following severe brain edema. *Seizure*. 2020;80:53-5.



- 636 [23] Hosseini AA, Shetty AK, Sprigg N, Auer DP, Constantinescu CS. Delirium as a presenting feature in COVID-19:  
637 Neuroinvasive infection or autoimmune encephalopathy? *Brain Behav Immun*. 2020;88:68-70.
- 638 [24] Alkeridy WA, Almaghlouth I, Alrashed R, Alayed K, Binkhamis K, Alsharidi A, et al. A Unique Presentation of Delirium  
639 in a Patient with Otherwise Asymptomatic COVID-19. *J Am Geriatr Soc*. 2020;68:1382-4.
- 640 [25] Jaywant A, Vanderlind WM, Alexopoulos GS, Fridman CB, Perlis RH, Gunning FM. Frequency and profile of objective  
641 cognitive deficits in hospitalized patients recovering from COVID-19. *Neuropsychopharmacology*. 2021.
- 642 [26] Heneka MT, Golenbock D, Latz E, Morgan D, Brown R. Immediate and long-term consequences of COVID-19 infections  
643 for the development of neurological disease. *Alzheimers Res Ther*. 2020;12:69.
- 644 [27] Vallamkondu J, John A, Wani WY, Ramadevi SP, Jella KK, Reddy PH, et al. SARS-CoV-2 pathophysiology and  
645 assessment of coronaviruses in CNS diseases with a focus on therapeutic targets. *Biochim Biophys Acta Mol Basis Dis*.  
646 2020;1866:165889.
- 647 [28] Wang Q, Davis PB, Gurney ME, Xu R. COVID-19 and dementia: Analyses of risk, disparity, and outcomes from electronic  
648 health records in the US. *Alzheimers Dement*. 2021.
- 649 [29] Coil DA, Albertson T, Banerjee S, Brennan G, Campbell AJ, Cohen SH, et al. SARS-CoV-2 detection and genomic  
650 sequencing from hospital surface samples collected at UC Davis. *PLoS One*. 2021;16:e0253578.
- 651 [30] Gomez-Isla T, Hollister R, West H, Mui S, Growdon JH, Petersen RC, et al. Neuronal loss correlates with but exceeds  
652 neurofibrillary tangles in Alzheimer's disease. *Ann Neurol*. 1997;41:17-24.
- 653 [31] Giannakopoulos P, Herrmann FR, Bussiere T, Bouras C, Kovari E, Perl DP, et al. Tangle and neuron numbers, but not  
654 amyloid load, predict cognitive status in Alzheimer's disease. *Neurology*. 2003;60:1495-500.
- 655 [32] Hou YJ, Okuda K, Edwards CE, Martinez DR, Asakura T, Dinnon KH, 3rd, et al. SARS-CoV-2 Reverse Genetics Reveals  
656 a Variable Infection Gradient in the Respiratory Tract. *Cell*. 2020;182:429-46 e14.
- 657 [33] Tian JH, Patel N, Haupt R, Zhou H, Weston S, Hammond H, et al. SARS-CoV-2 spike glycoprotein vaccine candidate  
658 NVX-CoV2373 immunogenicity in baboons and protection in mice. *Nat Commun*. 2021;12:372.
- 659 [34] Readhead B, Haure-Mirande JV, Funk CC, Richards MA, Shannon P, Haroutunian V, et al. Multiscale Analysis of  
660 Independent Alzheimer's Cohorts Finds Disruption of Molecular, Genetic, and Clinical Networks by Human Herpesvirus.  
661 *Neuron*. 2018;99:64-82 e7.
- 662 [35] Cairns DM, Rouleau N, Parker RN, Walsh KG, Gehrke L, Kaplan DL. A 3D human brain-like tissue model of herpes-  
663 induced Alzheimer's disease. *Sci Adv*. 2020;6:eaay8828.
- 664 [36] Thakur KT, Miller EH, Glendinning MD, Al-Dalahmah O, Banu MA, Boehme AK, et al. COVID-19 neuropathology at  
665 Columbia University Irving Medical Center/New York Presbyterian Hospital. *Brain*. 2021.
- 666 [37] Arbour N, Day R, Newcombe J, Talbot PJ. Neuroinvasion by human respiratory coronaviruses. *J Virol*. 2000;74:8913-21.
- 667 [38] Bullen CK, Hogberg HT, Bahadirli-Talbot A, Bishai WR, Hartung T, Keuthan C, et al. Infectability of human BrainSphere  
668 neurons suggests neurotropism of SARS-CoV-2. *ALTEX*. 2020;37:665-71.
- 669 [39] Zhang BZ, Chu H, Han S, Shuai H, Deng J, Hu YF, et al. SARS-CoV-2 infects human neural progenitor cells and brain  
670 organoids. *Cell Res*. 2020;30:928-31.
- 671 [40] Pellegrini L, Albecka A, Mallery DL, Kellner MJ, Paul D, Carter AP, et al. SARS-CoV-2 Infects the Brain Choroid Plexus  
672 and Disrupts the Blood-CSF Barrier in Human Brain Organoids. *Cell Stem Cell*. 2020;27:951-61 e5.
- 673 [41] Alexopoulos H, Magira E, Bitzogli K, Kafasi N, Vlachoyiannopoulos P, Tzioufas A, et al. Anti-SARS-CoV-2 antibodies  
674 in the CSF, blood-brain barrier dysfunction, and neurological outcome: Studies in 8 stuporous and comatose patients. *Neurol*  
675 *Neuroimmunol Neuroinflamm*. 2020;7.
- 676 [42] Buzhdygan TP, DeOre BJ, Baldwin-Leclair A, Bullock TA, McGary HM, Khan JA, et al. The SARS-CoV-2 spike protein  
677 alters barrier function in 2D static and 3D microfluidic in-vitro models of the human blood-brain barrier. *Neurobiol Dis*.  
678 2020;146:105131.
- 679 [43] Jacob F, Pather SR, Huang WK, Zhang F, Wong SZH, Zhou H, et al. Human Pluripotent Stem Cell-Derived Neural Cells  
680 and Brain Organoids Reveal SARS-CoV-2 Neurotropism Predominates in Choroid Plexus Epithelium. *Cell Stem Cell*.  
681 2020;27:937-50 e9.

- 682 [44] Ramani A, Muller L, Ostermann PN, Gabriel E, Abida-Islam P, Muller-Schiffmann A, et al. SARS-CoV-2 targets neurons  
683 of 3D human brain organoids. *EMBO J.* 2020;39:e106230.
- 684 [45] Lee S, Yu Y, Trimpert J, Benthani F, Mairhofer M, Richter-Pechanska P, et al. Virus-induced senescence is driver and  
685 therapeutic target in COVID-19. *Nature.* 2021.
- 686 [46] Sun X, He G, Qing H, Zhou W, Dobie F, Cai F, et al. Hypoxia facilitates Alzheimer's disease pathogenesis by up-regulating  
687 BACE1 gene expression. *Proc Natl Acad Sci U S A.* 2006;103:18727-32.
- 688 [47] Gordon DE, Jang GM, Bouhaddou M, Xu J, Obernier K, White KM, et al. A SARS-CoV-2 protein interaction map reveals  
689 targets for drug repurposing. *Nature.* 2020;583:459-68.

690

Fig. 1

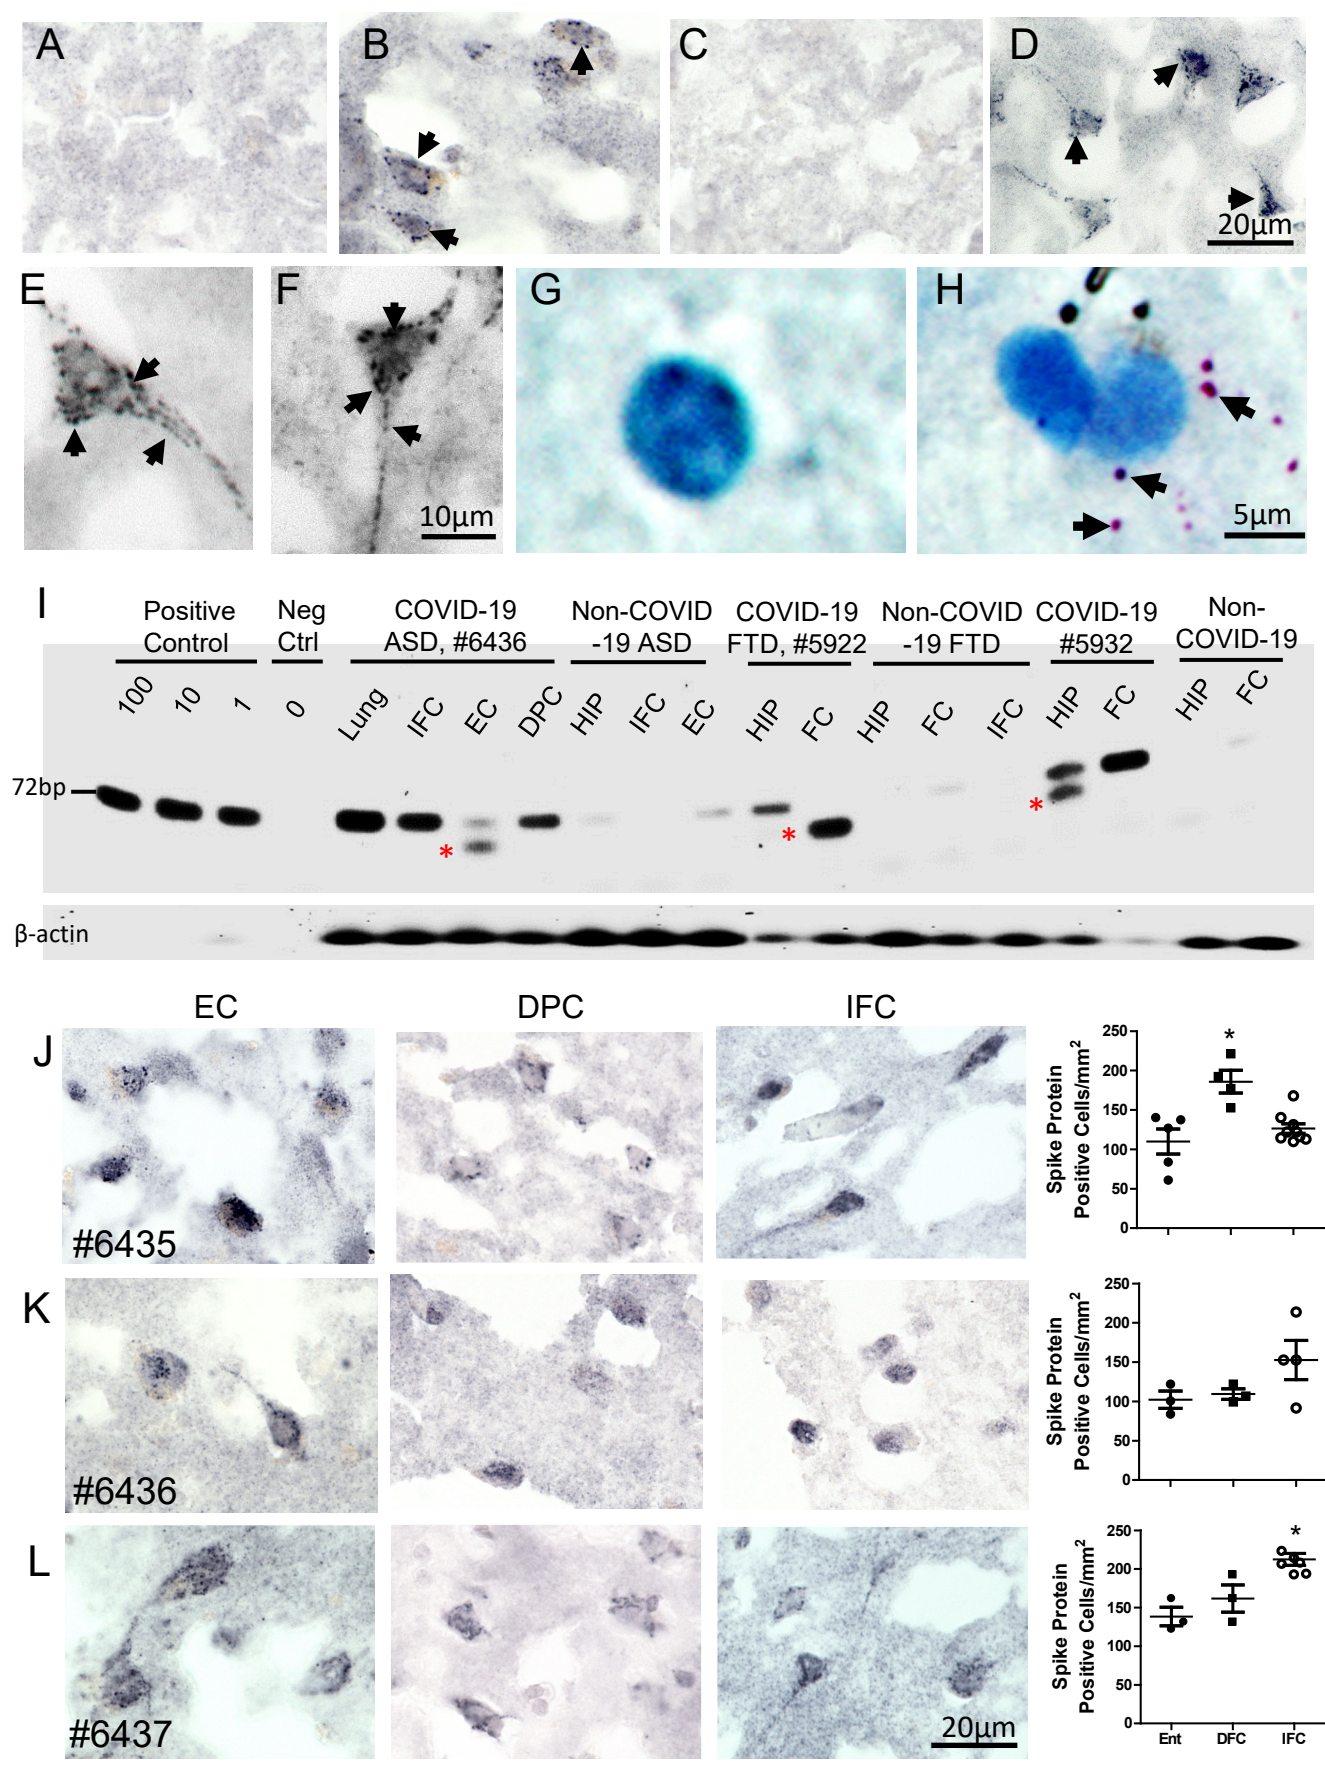



Fig. 2

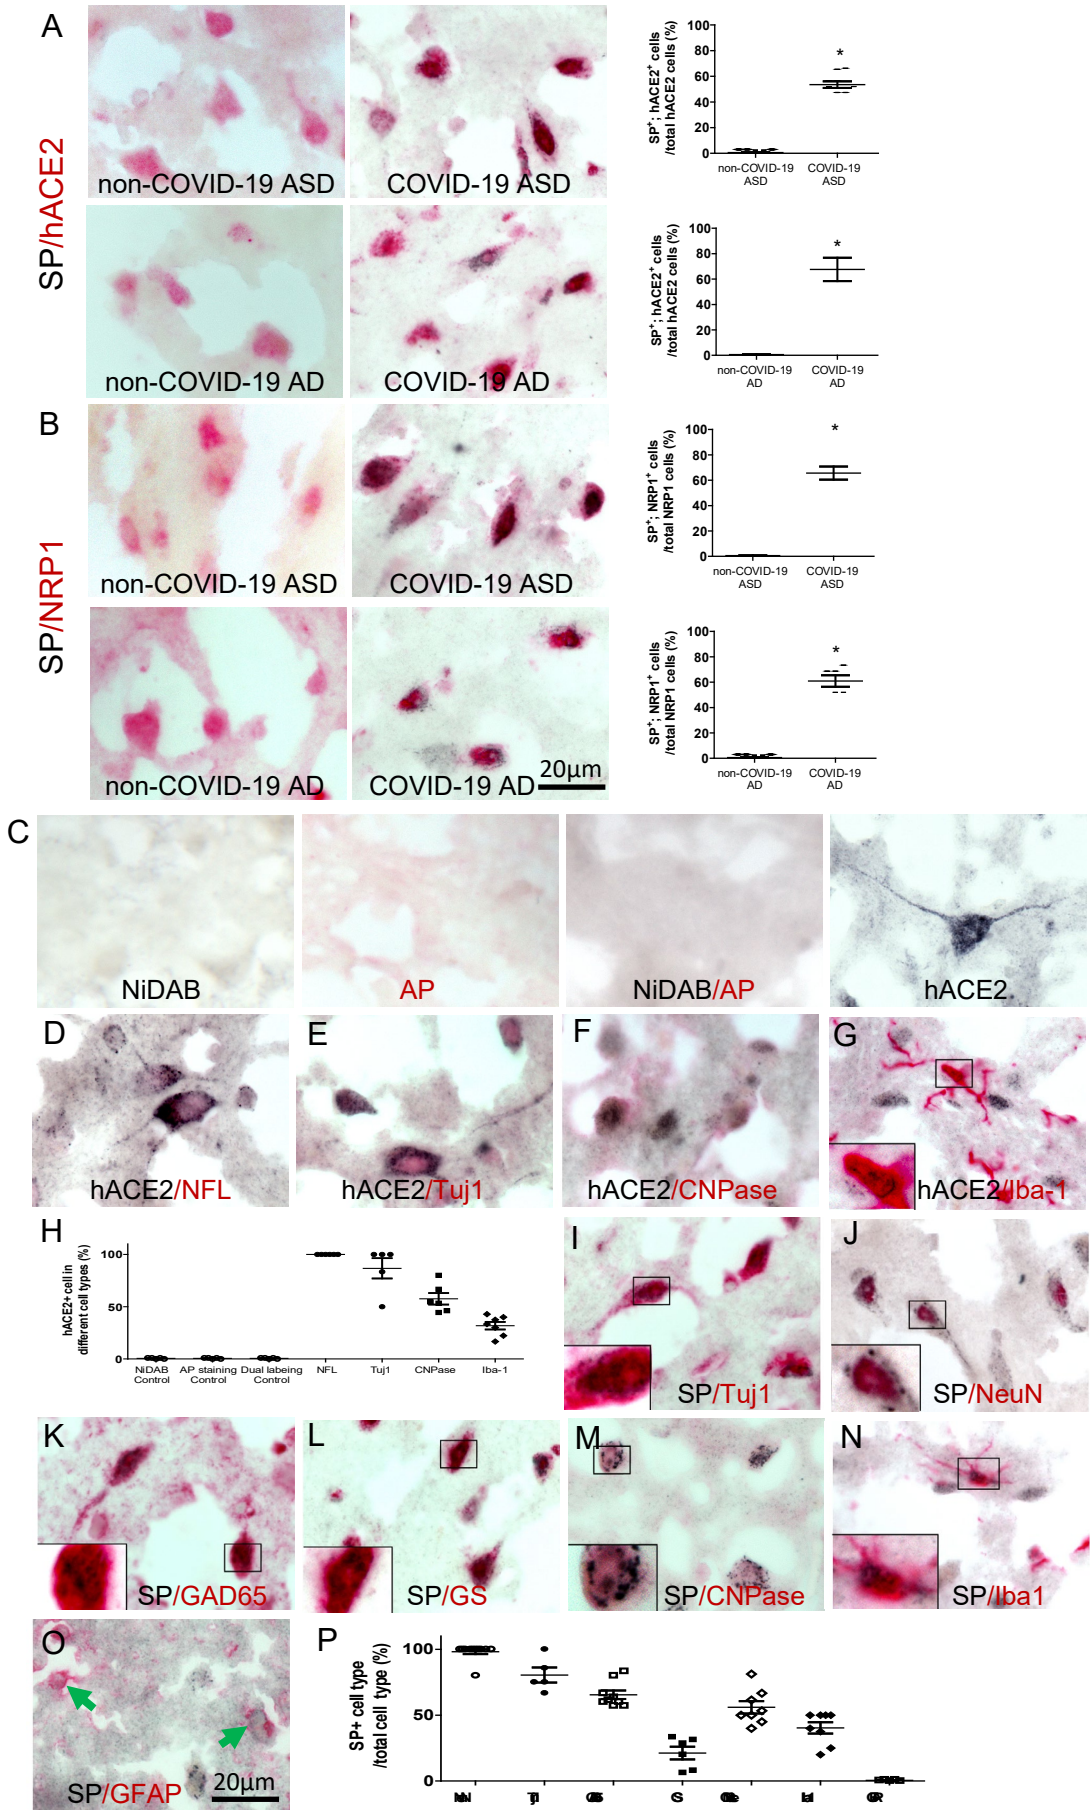

Fig. 3

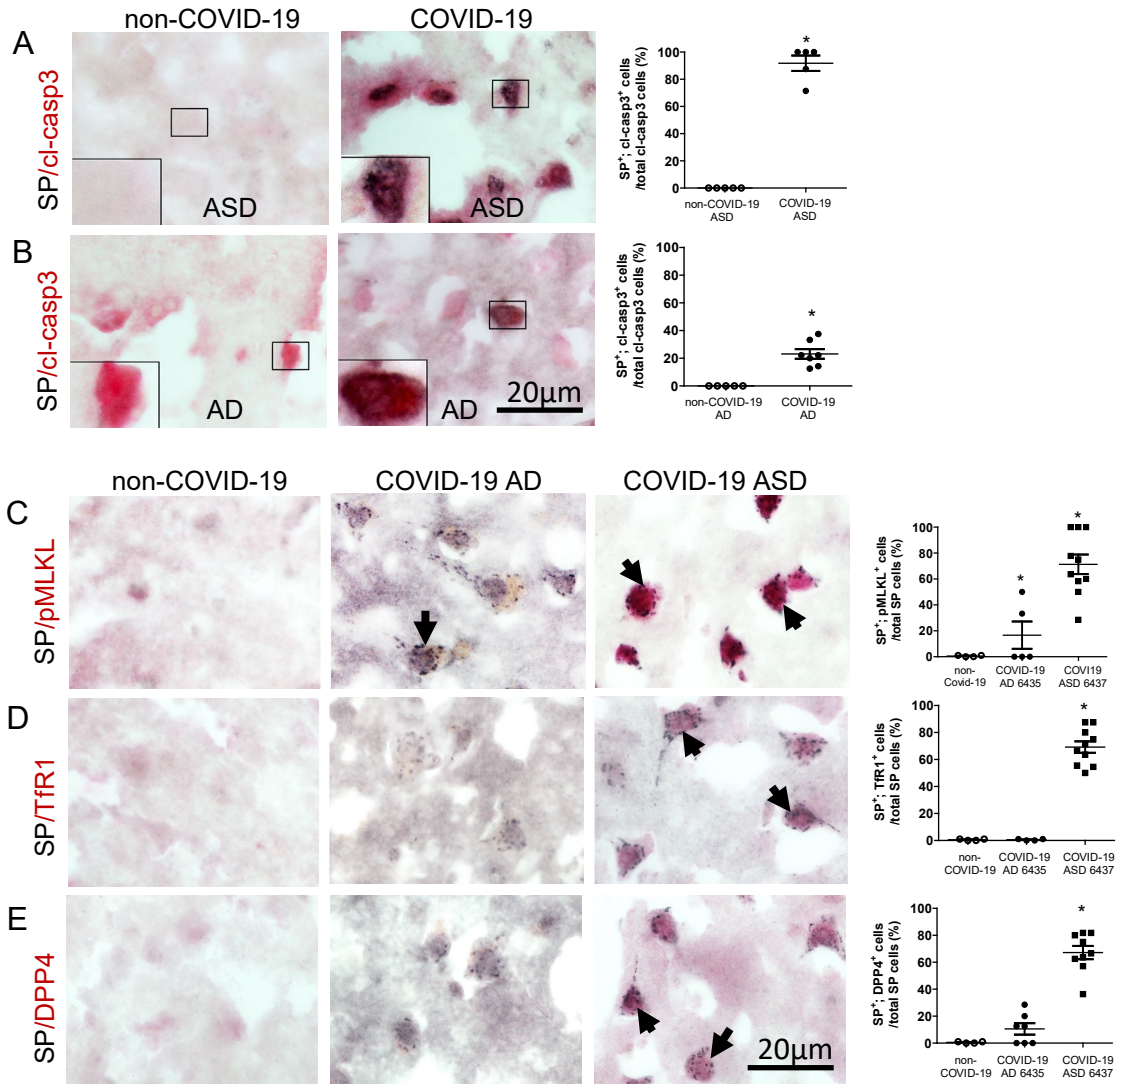



Fig. 4

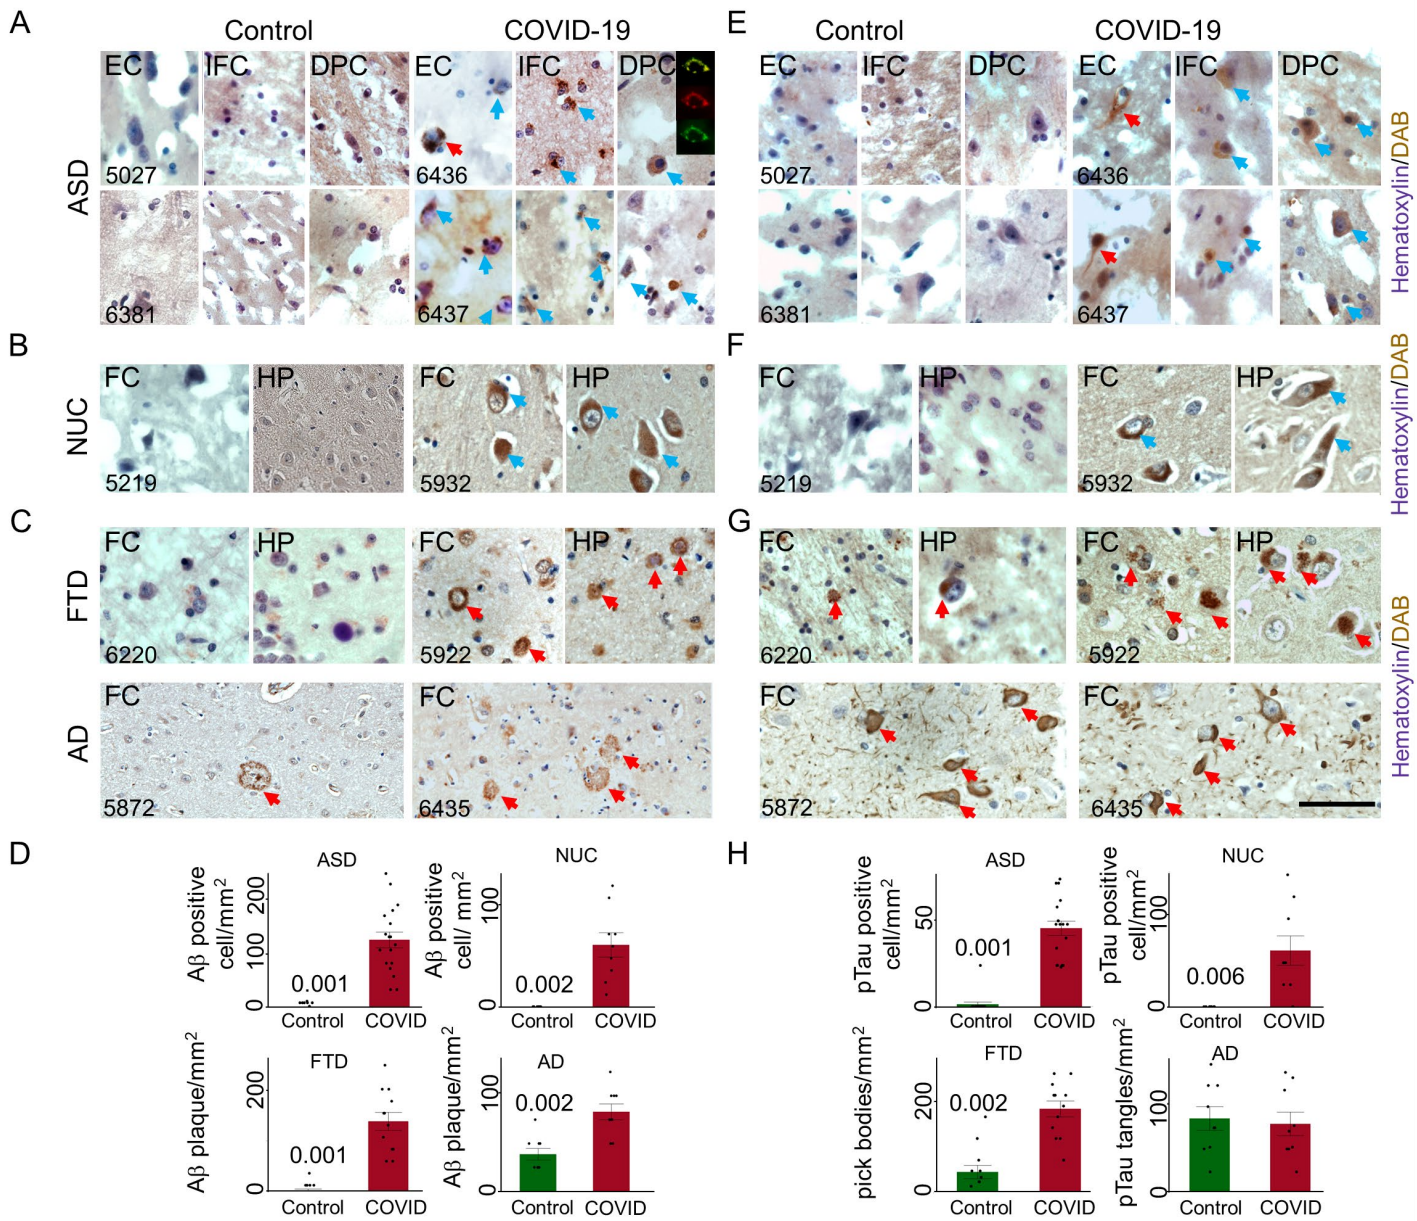

Fig. 5

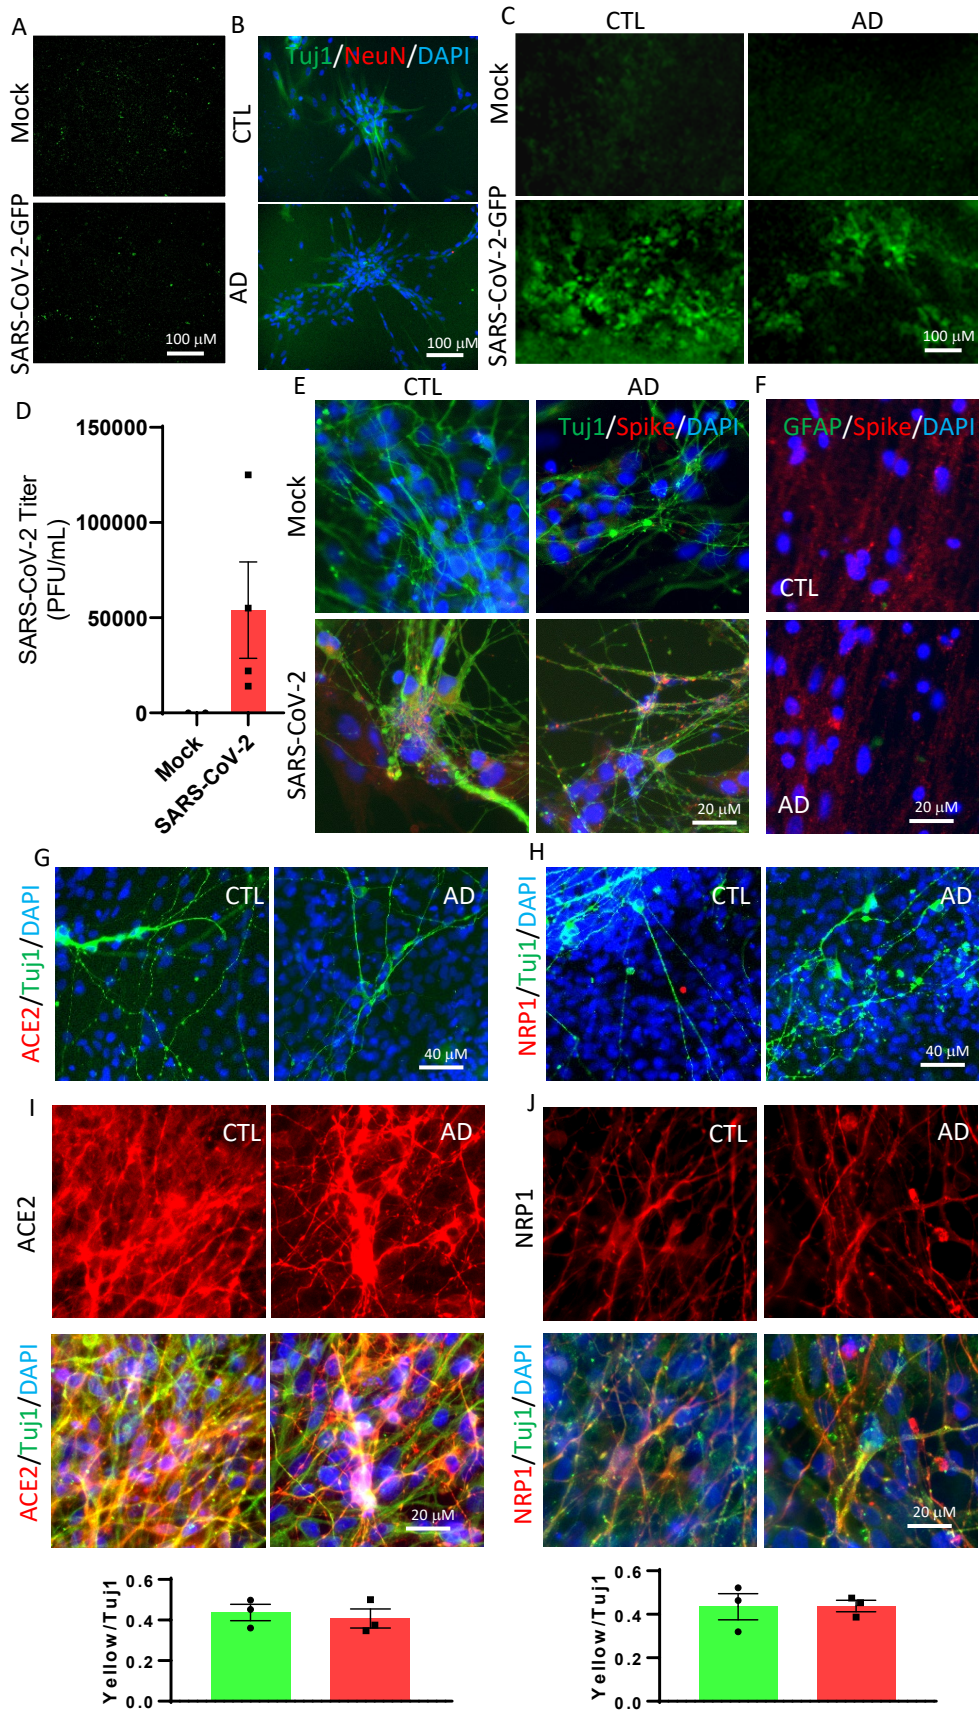



Fig. 6

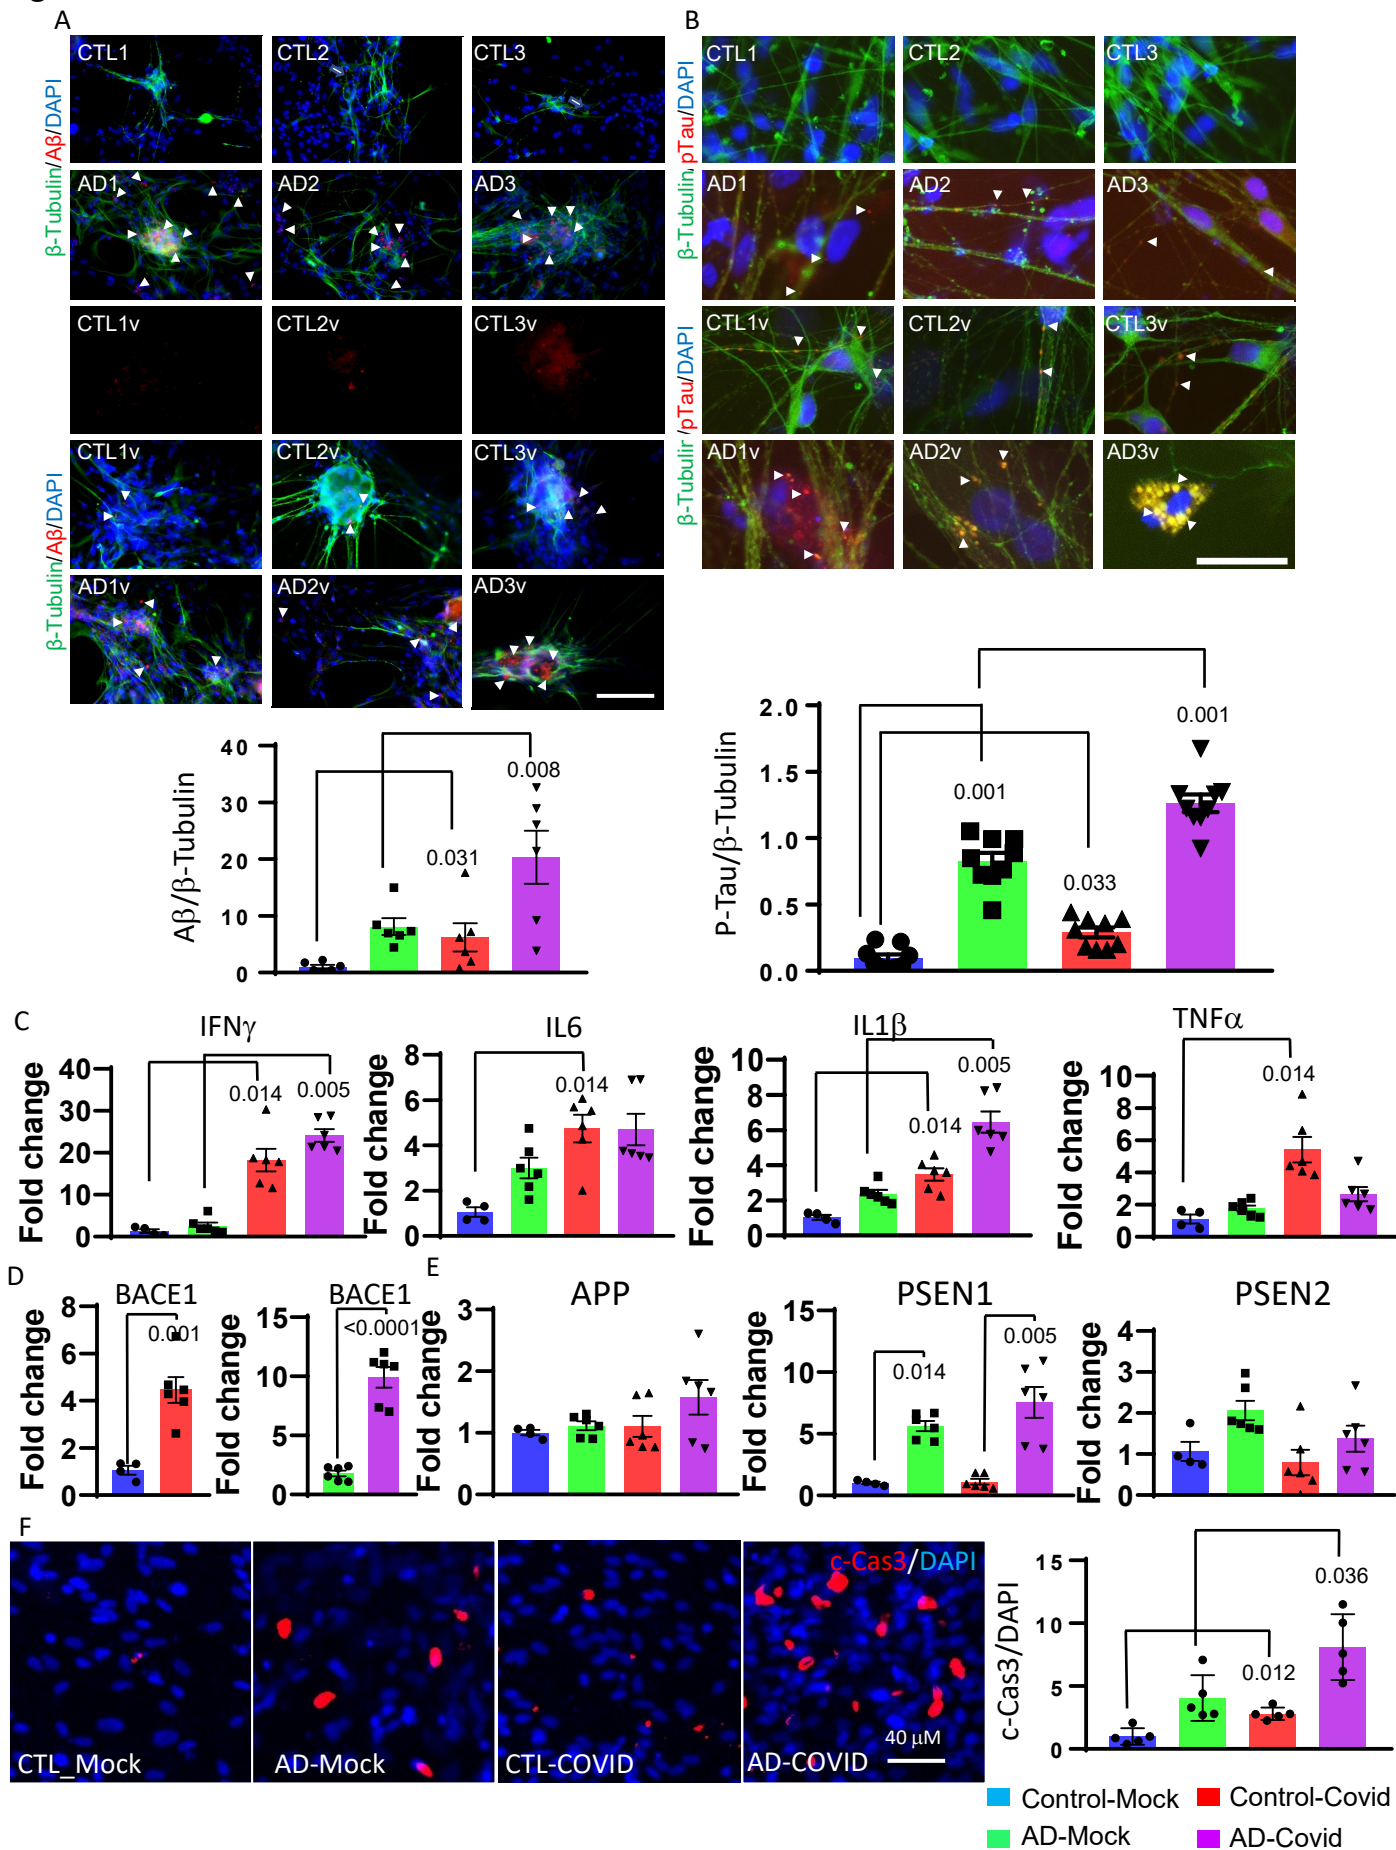



Fig. 7

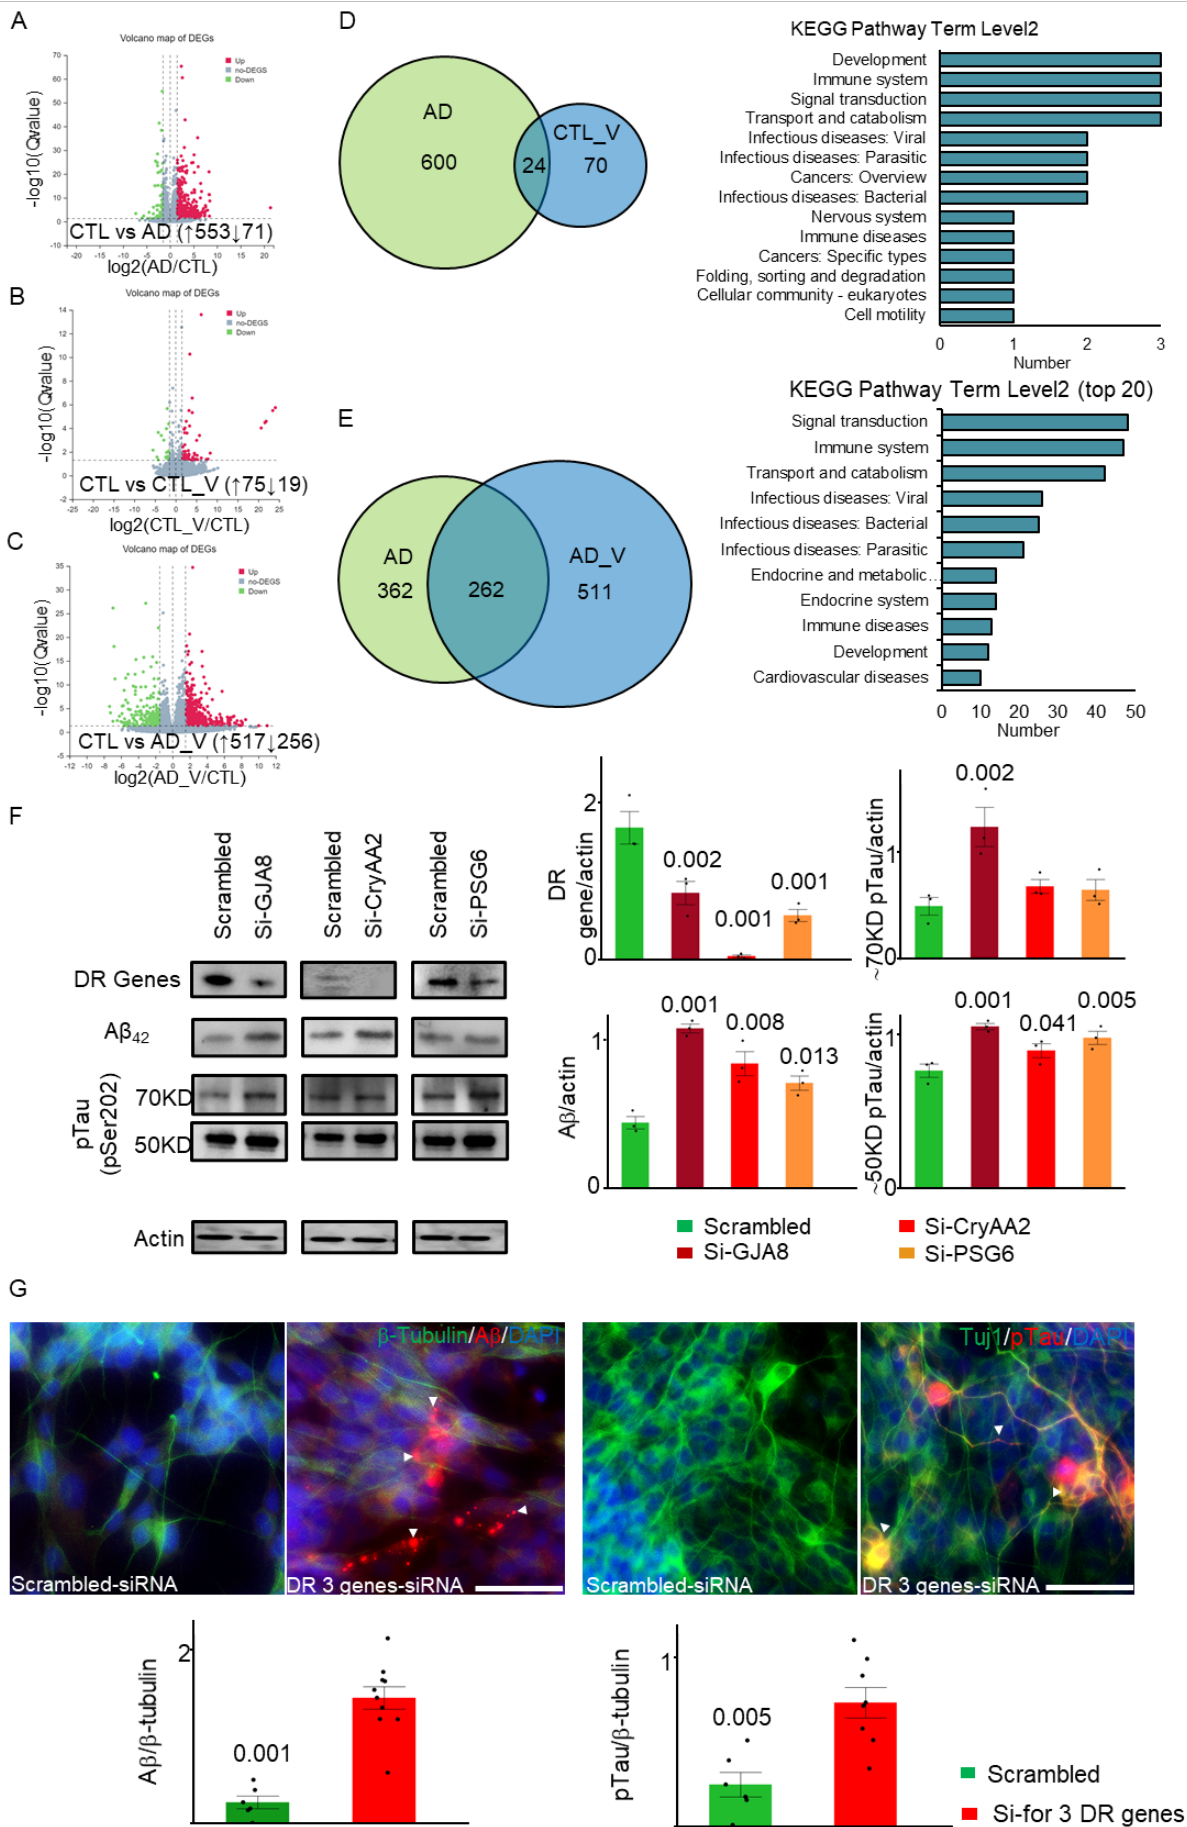

## **Methods**

### **Mammalian iPSCs and culture conditions**

Human iPSCs (1 cases of familial AD, 2 cases of sporadic AD, and 3 cases of apparently healthy controls) purchased from the Coriell Institute for Medical Research were used in our study. iPSCs were maintained on irradiated mouse CF-1 feeder layer (ATCC, Manassas, VA) at 37 °C and 5% CO<sub>2</sub> in Knockout DMEM medium (Invitrogen, Waltham, MA) supplemented with 20% Knockout Serum Replacer (KSR) (Invitrogen, Waltham, MA), 0.1 mM nonessential amino acids (Invitrogen, Waltham, MA), 2 mM GlutaMAX (Invitrogen, Waltham, MA), 0.1 mM β-Mercaptoethanol (Sigma-Aldrich, St. Louis, MO), 10 ng/ml recombinant human basic fibroblast growth factor (Invitrogen, Waltham, MA) (hiPSC medium).

### **Viral strains**

Vero E6 cells were maintained in EMEM (ATCC) media with 10% Serum Plus II Medium Supplement (Sigma-Aldrich). SARS-CoV-2 virus were obtained from the CDC following isolation from a patient in Washington State (WA-1 strain - BEI #NR-52281). SARS-CoV-2 GFP was generously provided by Dr. Ralph S. Baric. Stocks were prepared by infection of Vero E6 cells.

### **Brain Tissues**

The major source for postmortem tissues is the Brain and Tissue Bank at University of Maryland (UMB). The Brain and Tissue Bank is a brain and tissue repository of the NIH NeuroBioBank. The Brain Tissue Bank is a national resource for investigators utilizing human post-mortem brain tissues and related biospecimens for research in understanding the conditions of the nervous system. All brain tissue is procured, stored, and distributed according to applicable State and

Federal guidelines and regulations involving consent, protection of human subjects and donor anonymity. All brain tissues we obtained from the Brain Tissue Bank are de-identified.

Following formalin-fixed brain tissues were obtained from the Brain and Tissue Bank at UMB: COVID-19 autism (ASD, ID #6436, 38 year-old, #6437, 30 year), COVID-19 Alzheimer's disease (AD, #6535, 77 year), age-matched non-COVID-19 controls (6 cases), non-COVID-19 ASD (6 cases), non-COVID-19 FTD (frontotemporal dementia, 4 cases), and apparently healthy subjects (9 cases). We also obtained 4 cases of non-COVID-19 AD from the NIH NeuroBioBank. Samples of three brain regions were obtained from individual: dorsolateral prefrontal cortex (Broca area 8), inferior frontal cortex (Broca area 44), entorhinal cortex.

Following frozen brain tissues were also obtained from the Brain and Tissue Bank. The frozen tissues were used for RNA extraction followed by reverse transcription and PCR detection of SARS-CoV-2 with CDC specific primers. The frozen tissues include SARS-CoV-2 infected lung and brain tissues (ASD, #6436), age-matched non-COVID-19 ASD controls and FTD controls.

In addition, paraffin sections and frozen brain tissues of the subjects of COVID-19 FTD (1 case) and COVID-19 individual without underlying condition, and non-COVID-19 AD (3 cases) were obtained from the Biomarker Laboratory and Biorepository at University of Southern California Alzheimer's Therapeutic Research Institute (USC ATRI) at University of California San Diego (UCSD).

### **Neuronal Cells**

Primary Human Neurons were obtained from Neuromics (CA3 Bioscience, MN, USA). The cells were maintained in neuron growth medium supplemented (CA3 Bioscience, MN, USA) with 10% FBS at 37 °C in a humidified atmosphere of 5% CO<sub>2</sub> in culture flask.

## **Immunohistology staining of spike protein and markers of neural cells and programmed cell death**

The formalin-fixed brain tissue blocks were immersed in 30% sucrose, then embed in OCT cryostat sectioning medium. The tissues were sectioned on a cryostat at 10  $\mu\text{m}$ . After rehydrated, the sections were treated with 2%  $\text{H}_2\text{O}_2$  for 15 minutes to quench the endogenous peroxidase. The staining was performed as previously described [1, 2]. Briefly, the slices were incubated with blocking solution consisting of 4% normal donkey serum (NDS), 0.2% triton (TX)-100 in phosphate-buffered saline (PBS) for 60 min, then with primary antibody diluted in blocking solution at 4  $^\circ\text{C}$  overnight. The slices were washed with PBS and incubated for 1 h in a biotinylated secondary antibody anti-mouse or rabbit (depending on the host species producing the primary antibodies). After three times of PBS washes, the sections were incubated in ABC solution (1:500; Vectastain Elite Kit) for 1h. The ABC solution was prepared and placed on ice for 30 minutes before use. Antibody labeling was then visualized via precipitation with a diaminobenzidine (DAB, 10mg/50ml) chromogen solution in PBS + 0.003%  $\text{H}_2\text{O}_2$  (brown products) or with DAB in 0.175 M sodium acetate + 0.5% nickel ammonium sulfate + 0.003%  $\text{H}_2\text{O}_2$  (for Ni-DAB staining, black products). If necessary, the sections were counterstained with hematoxylin before coverslip.

For immunohistology dual labeling, the sections were subject Ni-DAB staining with first primary antibody as described above. After PBS wash, the sections were re-blocked for 1 hours and following incubation with the second primary antibody at 4 $^\circ\text{C}$  overnight. Next day, the sections were washed with PBS and incubated with alkaline phosphatase (AP)-conjugated goat secondary antibody (1:200) for 1 h, followed by incubation with AP red substrate (1:100) for 20-30 minutes. DAB-stained sections were counterstained with hematoxylin. Sections were immersed in hematoxylin solution for 3 min and rinsed in running tap water until rinse water is colorless. After

differentiation by dipping slides 10 times in acid rinse solution (1% hydrochloric acid (HCl) in 70% ethanol), the slides were incubated in the bluing solution (1.5% lithium carbonate) for 30 s. There is no hematoxylin counterstaining performed for Ni-DAB or Ni-DAB/AP dual labeling before dehydrate and coverslip.

Dehydrate and coverslip sequence: 70% ethanol, 3 minutes; 95% ethanol I and II, 3 minutes for each; 100% ethanol I and II, 3 minutes for each; xylene I and II, 5 minutes for each. Mounting medium: Permount Mounting Medium.

### **A $\beta$ and p-Tau Immunohistochemistry**

$\beta$ -amyloid (A $\beta$ ) and phospho-tau (pTau) Immunohistochemistry was carried out as previously described [3]. Briefly, the coronal sections were rehydrated, and endogenous peroxidase was quenched by treating with 0.3% H<sub>2</sub>O<sub>2</sub>. For A $\beta$  staining, the antigen retrieval was carried by using 70% formic acid for 20 minutes. Antigen retrieval for the other antibodies was by autoclaving at 120°C for 5 min. The primary antibody was applied on the sections at 4°C overnight, followed by 60-min incubation with specific secondary antibody coupled with HRP (Histofine simple stain MaxPo M/R, Nichirei Bioscience Inc., Japan) at room temperature. DAB reaction was performed to visualize the color. All antibody dilutions and washing steps were performed in phosphate buffer, pH 7.2. HRP intensities and cell counts in 3 different regions (Frontal Cortex, Entorhinal Cortex) in three sections/slices from each group were measured using the ImageJ Fiji platform. Data were represented as staining intensity per square millimeter. Because the MaxPo M/R antibodies are Fab fragments, the blocking is not necessary.

### **Thioflavin staining**

The A $\beta$  staining Thioflavin-T were performed following the similar antigen protocol. After blocking with 5% goat serum for 30 minutes overnight incubation with anti A $\beta$  antibody 6E10

were performed. In the following day the brain sections were probed with Alexa-fluor594 labeled secondary antibody. After an extensive washing, Thioflavin-T (0.1% in 50% DMSO) were applied over the brain sections for 5 minutes. An extensive washing was performed using PBS containing 0.05% tween20. Furthermore, the fluorescent background was quenched with Tureblack (Biotium, USA). Thioflavin-T and Alexa-fluor594 intensity were measured using a fluorescence laser microscope (LSM780, Zeiss, Germany).

### **Immunofluorescence staining**

For immunofluorescence staining, cells were cultured on a collagen-coated coverslip. After specific treatments, cells were fixed with 4% paraformaldehyde-PBS. The cell membrane was permeabilized with 0.25% Triton-X100 and/or 5 mg/ml digitonin followed by blocking with 5% BSA. After probing with primary antibodies, specific Alexa-fluor labeled secondary antibody were used. 4',6-Diamidino-2-phenylindole dihydrochloride (DAPI) staining was used to visualize the nuclei (Thermo Fisher Scientific). Fluorescence was assessed using a fluorescence laser microscope (LSM780, Zeiss, Germany).

### **Detection of SARS-CoV-2 RNA using RNAscope**

RNA *In situ* hybridization in FFPE slides was performed by using the RNAScope 2.5 HD Detection (RED) Kit (ACD, CA), based on the protocol provided by the manufacturer. Briefly, after deparaffinization and antigen retrieval, the slides were hybridized with the 40-ZZ positive-sense RNA probe, V-SARS-CoV-2-S (Ref#: 854841, ACD) in the oven at 40 °C for 2 hours. We then washed the slides with 1 X Wash Buffer for 2 min twice. The remaining hybridization procedure at 40 °C include: 1) Amp 1, 30 min; 2) Amp 2, 15 min; 3) Amp, 30 min; 4) Amp 4, 15 min; 5) Amp 5, 30 min, and 6) Amp 6, 15 min with an interval of repeated 1X Wash buffer for 2 min. Subsequently, the signals were detected by incubating with a mixture of RED-B and RED-A

at ratio of 1:60 for 10 min at room temperature followed by counterstaining with 50% hematoxylin for 2 min.

### **Generation of human induced pluripotent stem cells (hiPSCs)**

Human fibroblast from Coriell Institute were induced into pluripotent stem cell with CMV promoter Thomson factors lentivirus set which contains Lenti-virus harboring Oct4, Sox2, Nanog, and Lin28 (Cat#: G353, ABM Inc., Canada). Briefly, human fibroblasts were seeded on 6 well plate with  $8 \times 10^4$  per well at day -2 and transduced with Lenti-virus particles (MOI of 4:3:3:3). Cells were cultured for 7 days and replated at  $2 \times 10^4$  cells per well of 6 well plate on irradiated mouse embryonic fibroblasts (MEF) feeder layer. From day 8, medium was replaced with Knockout DMEM (Invitrogen) supplemented with 20% Knockout Serum Replacer (KSR, Invitrogen), 0.1 mM nonessential amino acids (Invitrogen), 2 mM GlutaMAX (Invitrogen), 0.1 mM  $\beta$ -mercaptoethanol (Sigma-Aldrich, St. Louis, MO), 10 ng/ml recombinant human basic fibroblast growth factor (Invitrogen) (hiPSC medium). On week 3-4, iPSCs were identified from morphology change and picked out into 48-well plates with MEF feeder.

### **Neuron differentiation from hiPSCs.**

hiPSCs were differentiated into neurons as described with modification (Nat Med. 2018 May;24(5):647-657). hiPSCs dissociated with collagenase IV (Stem Cell Technologies) were cultured in suspension to form embryoid bodies (EB) in hES medium without bFGF for 5 days followed by maintenance in NIM medium containing Dulbecco's modified Eagle's medium/F12 and Neurobasal Medium (1:1, Thermo Fisher), 1% N2 Supplement (Life Technologies), 1% B27 Supplement (Life Technologies), nonessential amino acids, and 0.5% penicillin/streptomycin (Life Technologies) supplemented with inhibitors of the TGF- $\beta$  receptor (SB431542, Stemgent; 5  $\mu$ M) and the bone morphogenetic protein receptor (LDN-193189, Stemgent; 0.25  $\mu$ M). On day 7,



spheres were transferred to wells coated with Matrigel (BD Biosciences) and grown in NPM medium which is same to NIM medium but replace SB431542 and LDN-193189 with 10 ng/ml bFGF (PeproTech), 10 ng/mL epidermal growth factor (EGF) (PeproTech), and 2 µg/ml heparin (Sigma). On day 15, medium was changed to NDM medium which is same to NPM medium but replace bFGF, EGF and heparin in NPM with brain-derived neurotrophic factor (10 ng/ml; PeproTech), and glial cell–derived growth factor (10 ng/ml; PeproTech). Around day 20, neurons were observed and were further differentiated for 30 days.

### **Immunofluorescence staining in iPSCs-derived neurons**

Neurons derived from AD or Control (from healthy individuals) hiPSCs with or without SARS-CoV-2 infection were fixed in 4% paraformaldehyde (PFA) for 10 minutes followed by blocking in 5% bovine serum albumin in PBST (0.1% Triton X-100 in PBS) for 10 minutes. The following antibodies were used as primary antibodies: Spike (1:200), Tuj1 (1:500), ACE2 (1:200), NRP1 (1:200), NeuN (1:200), GFAP (1:200), c-Cas3 (1:200). Normal rabbit or mouse IgG using the same dilutions as primary antibodies were used as controls. After washing with PBS, neurons were incubated with secondary antibodies. Then, neurons were counterstained with DAPI and mounted with aqueous mounting medium (Sigma, St Louis, MO). Images were captured under a microscope (Keyence BZ X700, Osaka, Japan).

### **SARS-CoV-2 production and infection of hiPSCs derived neurons**

The stock of SARS-CoV-2 virus (CDC, WA-1 strain - BEI #NR-52281, and SARS-CoV-2 GFP generously provided by Dr. Ralph S. Baric, at the Department of Epidemiology and Department of Microbiology and Immunology, University of North Carolina at Chapel Hill), were prepared by infection of Vero E6 cells for two days when CPE (cytopathic effects) was starting to become visible. Media were collected and clarified by centrifugation prior to being aliquoted for storage



at  $-80^{\circ}\text{C}$ . Neurons derived from hiPSCs were infected with SARS-CoV-2 at  $5 \times 10^3$ ,  $1 \times 10^4$ , or  $2 \times 10^4$  plaque forming units (pfu) per well of 6 well plate for 48 h in NDM medium. All work with infectious virus was performed in a Biosafety Level 3 laboratory and approved by our Institutional Biosafety Committee.

### **SARS-CoV-2 Titering by semi-solid plaque assay**

VeroE6 cells were plated in 12 well plates with  $2 \times 10^5$  cells per well one day prior to processing. On the day of processing, samples were serially diluted 1:10 and 200uL of each sample dilution was added to each well in singlet and incubated for 1 hour at  $37^{\circ}\text{C}$  (5%  $\text{CO}_2$ ) with rocking every 15 minutes. Following incubation, 2 mL of a semi-solid agar overlay, DMEM (gibco) containing 4% fetal bovine sera (gibco) and 2% agarose, was added to each well. Plates are incubated for 3 days at  $37^{\circ}\text{C}$  (5%  $\text{CO}_2$ ) before plates were fixed with 4% paraformaldehyde, stained with crystal violet stain, and plaques counted.

### **Neural maturation, siRNA Transfection, and Lenti virus transduction**

Primary Human Neurons obtained from Neuromics (Edina, MN) grow for four weeks in the Neuromics growth medium supplemented with brain derived neurotropic factor (BDNF). Medium were changed every 2 days. For further experiment, cells were plated on a 6-well plate in neuron growth medium supplemented with 5% FBS. siRNA transfection was carried out using XtremeGENE siRNA transfection reagent (Roche, Basel, Switzerland) at 60% cell confluency. Medium was replaced with fresh medium 24 hours post-transfection and maintained for additional 48 hours. Lentivirus mediated overexpression of the FCGR, LILRB5 and OTOR carried out using virus particles obtained from OriGene (Rockville, MD). Virus transduction were carried out at 5.0 MOI using polybrene. GFP expressing lenti-particles were used as the control.

## **RNA sequencing**

mRNAs were extracted from neurons derived from AD or Control hiPSCs with or without SARS-CoV-2 infection and sequenced at BGI on DNBSeg platform. Briefly, mRNAs were extracted with Trizol reagent. First-strand cDNA was generated using random hexamer-primed reverse transcription, followed by a second-strand cDNA synthesis. The synthesized cDNA was subjected to end-repair and then was 3' adenylated. Adapters were ligated to the ends of these 3' adenylated cDNA fragments, followed by PCR. PCR products were purified with Ampure XP Beads and dissolved in EB solution. Library was validated on the Agilent Technologies 2100 bioanalyzer. The double stranded PCR products were heat denatured and circularized by the splint oligo sequence. The single strand circle DNA were formatted as the final library. The library was amplified with phi29 to make DNA nanoball (DNB) which had more than 300 copies of one molecular. The DNBs were load into the patterned nanoarray and single end 50 (pair end 100) bases reads were generated in the way of sequenced by synthesis.

## **Quantitative reverse transcription PCR**

mRNAs were extracted from neurons derived from AD or Control hiPSCs with or without SARS-CoV-2 infection in Trizol reagent (ThermoFisher, Waltham, MA) and followed by cDNA synthesis with SuperScript™ III Reverse Transcriptase kit (ThermoFisher). RT-PCR were performed with PowerUp™ SYBR™ Green Master Mix (ThermoFisher) with 45 cycles and PCR products were loaded into 2% agarose gel and run at 75 v for 5.5 h. Gel Image were recorded with Bio-Rad ChemiDoc MP imaging system (Hercules, CA).

## **QUANTIFICATION AND STATISTICAL ANALYSIS**

In the experiment assessing the impact of SARS-CoV-2 virus on the brain pathology, we analyzed (a) 5 Covid19 samples consisting of AD-Covid19 (1 case), FTD-Covid19 (1 case), ASD-Covid19

(2 cases), and Covid-19 without underlying condition (1 case); (b) 6 cases of sporadic AD as the controls; and (c) 8 cases of age-matched, non-Covid-19 healthy controls. Labeled cells from at least 3 random fields ( $n \geq 3$ ) were counted. Data are presented as the means  $\pm$  standard errors (SEs). Student's *t* test was used for two group comparisons. One-way ANOVA was performed for comparisons of more than two group using graphPad prism software v7. In ANOVA, a *Tukey* test was used to estimate the significance between groups. Differences were considered statistically significant when  $P < 0.05$ .

In the experiment with cell culture studies, we differentiated neurons from 3 iPSC lines derived from AD fibroblast cells and 3 lines from healthy subjects as the controls. The experiments were repeated in triplicate as we previously described [4, 5]. Data are presented as the means  $\pm$  standard errors (SEs). Student's *t* test was used for two group comparisons. One-way ANOVA plus *Tukey* test was performed for comparisons of more than two group. Differences were considered statistically significant when  $P < 0.05$ .

## Reference:

- [1] Shen WB, McDowell KA, Siebert AA, Clark SM, Dugger NV, Valentino KM, et al. Environmental neurotoxin-induced progressive model of parkinsonism in rats. *Ann Neurol*. 2010;68:70-80.
- [2] Shen WB, Plachez C, Tsymbalyuk O, Tsymbalyuk N, Xu S, Smith AM, et al. Cell-Based Therapy in TBI: Magnetic Retention of Neural Stem Cells In Vivo. *Cell Transplant*. 2016;25:1085-99.
- [3] Elahi M, Hasan Z, Motoi Y, Matsumoto SE, Ishiguro K, Hattori N. Region-Specific Vulnerability to Oxidative Stress, Neuroinflammation, and Tau Hyperphosphorylation in Experimental Diabetes Mellitus Mice. *J Alzheimers Dis*. 2016;51:1209-24.
- [4] Xu C, Shen W-B, Reece EA, Hasuwa H, Harman C, Kaushal S, et al. Maternal diabetes induces senescence and neural tube defects sensitive to the senomorphic rapamycin. *Science Advances*. 2021;7:eabf5089.
- [5] Wang F, Wu Y, Gu H, Reece EA, Fang S, Gabbay-Benziv R, et al. Ask1 gene deletion blocks maternal diabetes-induced endoplasmic reticulum stress in the developing embryo by disrupting the unfolded protein response signalosome. *Diabetes*. 2015;64:973-88.

**Table S1. Relative numbers of spike protein<sup>+</sup> cells in 5 COVID-19 cases**

| <b>ID#</b>  | <b>Disease</b> | <b>Age</b> | <b>EC</b>  | <b>DPC</b> | <b>IFC</b> |
|-------------|----------------|------------|------------|------------|------------|
| <b>6435</b> | COVID-19, AD   | 77         | ++         | ++         | ++         |
| <b>6436</b> | COVID-19, ASD  | 38         | ++         | ++         | ++         |
| <b>6437</b> | COVID-19, ASD  | 30         | ++         | ++         | +++        |
| <b>5932</b> | COVID-19, NUC  | 71         | Not tested | Not tested | +          |
| <b>5922</b> | COVID-19, FTD  | 70         | Not tested | Not tested | +          |

AD: Alzheimer's disease; ASD: autism; EC: entorhinal cortex; DPC: dorsolateral prefrontal cortex; IFC: inferior frontal cortex. FTD: frontotemporal dementia. NUC: no underlying condition. +++: >200 spike protein<sup>+</sup> cells/mm<sup>2</sup>; ++: 100-200 spike protein<sup>+</sup> cells/mm<sup>2</sup>; +: <100 spike protein<sup>+</sup> cells/mm<sup>2</sup>



**Fig. S1**

non-Covid-19

Covid-19 ASD

**A**

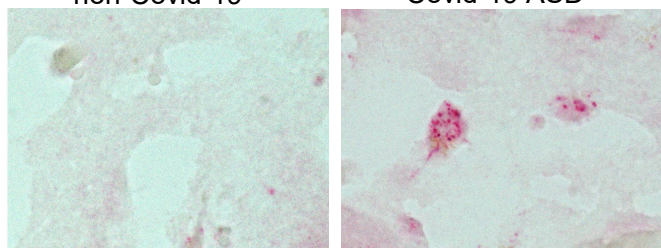

**B**

Non-COVID  
FTD

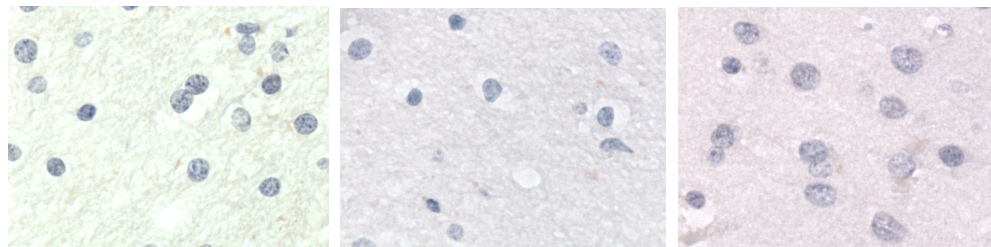

**C**

COVID-19  
FTD

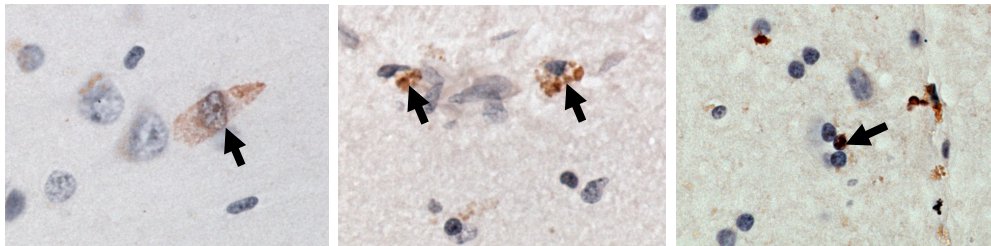

**D**

Non-COVID  
NUC

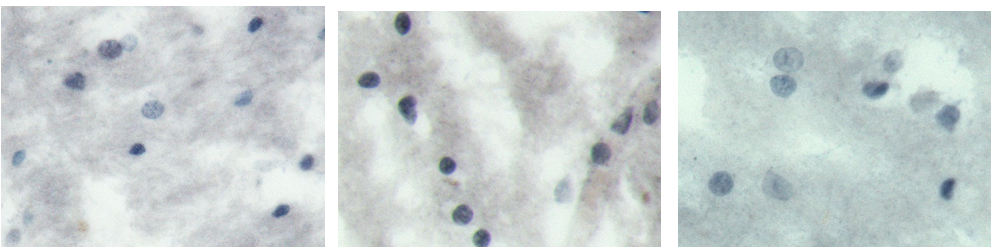

**E**

COVID-19  
NUC

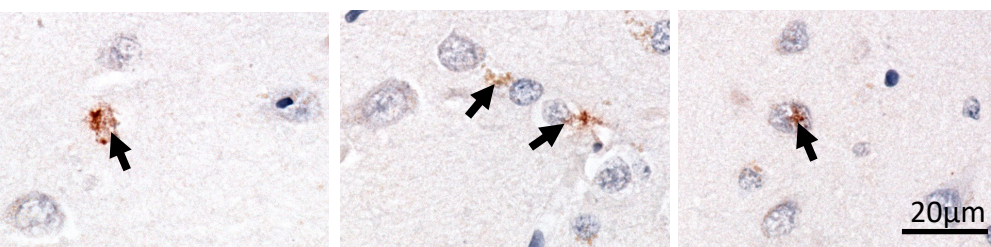

**F**

Non-COVID  
Control

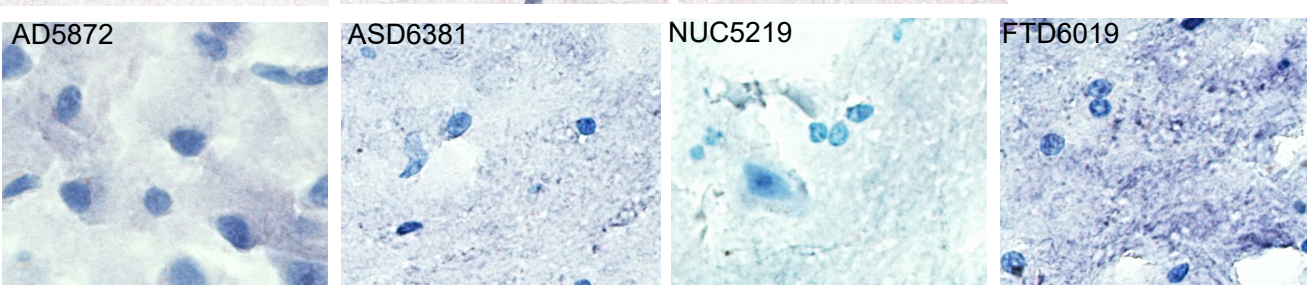

COVID-19

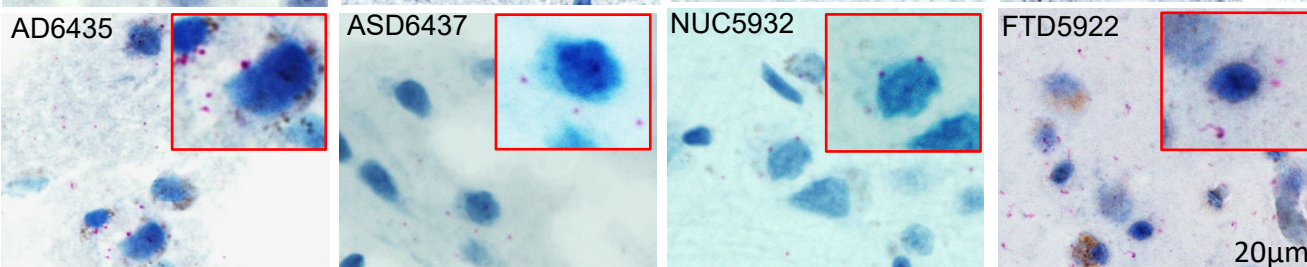



Fig. S2

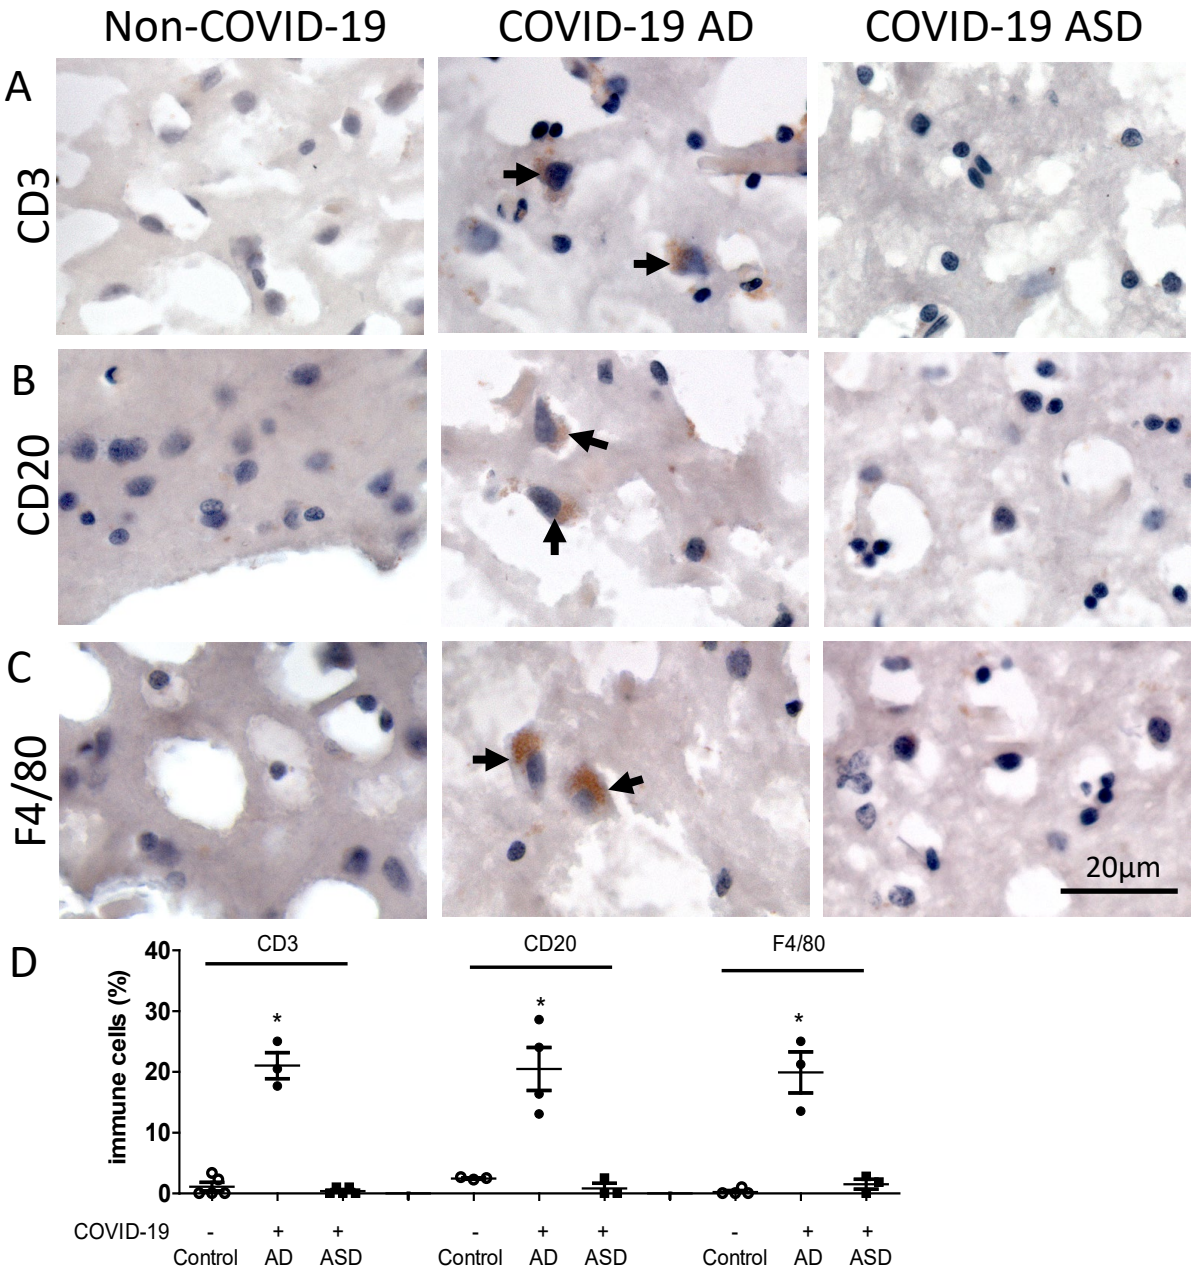

Fig. S3

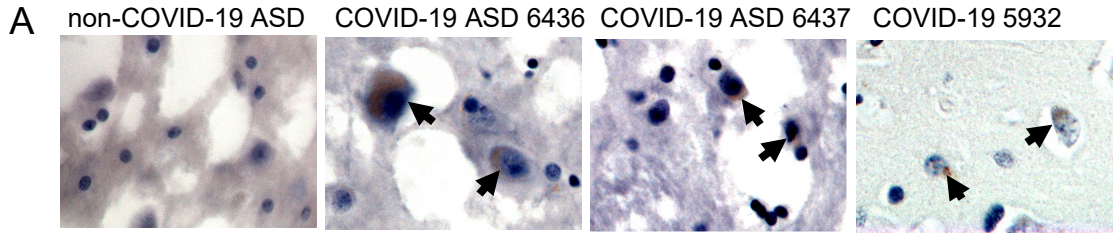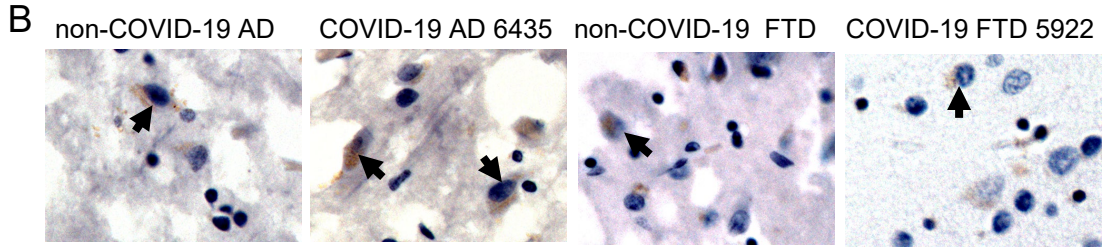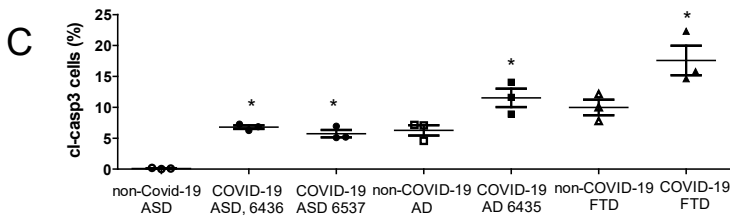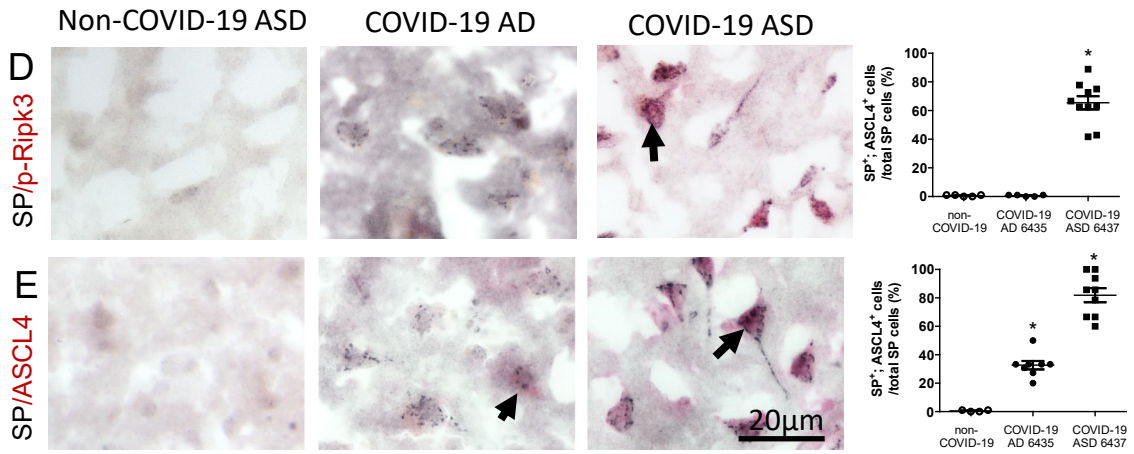

Fig. S4

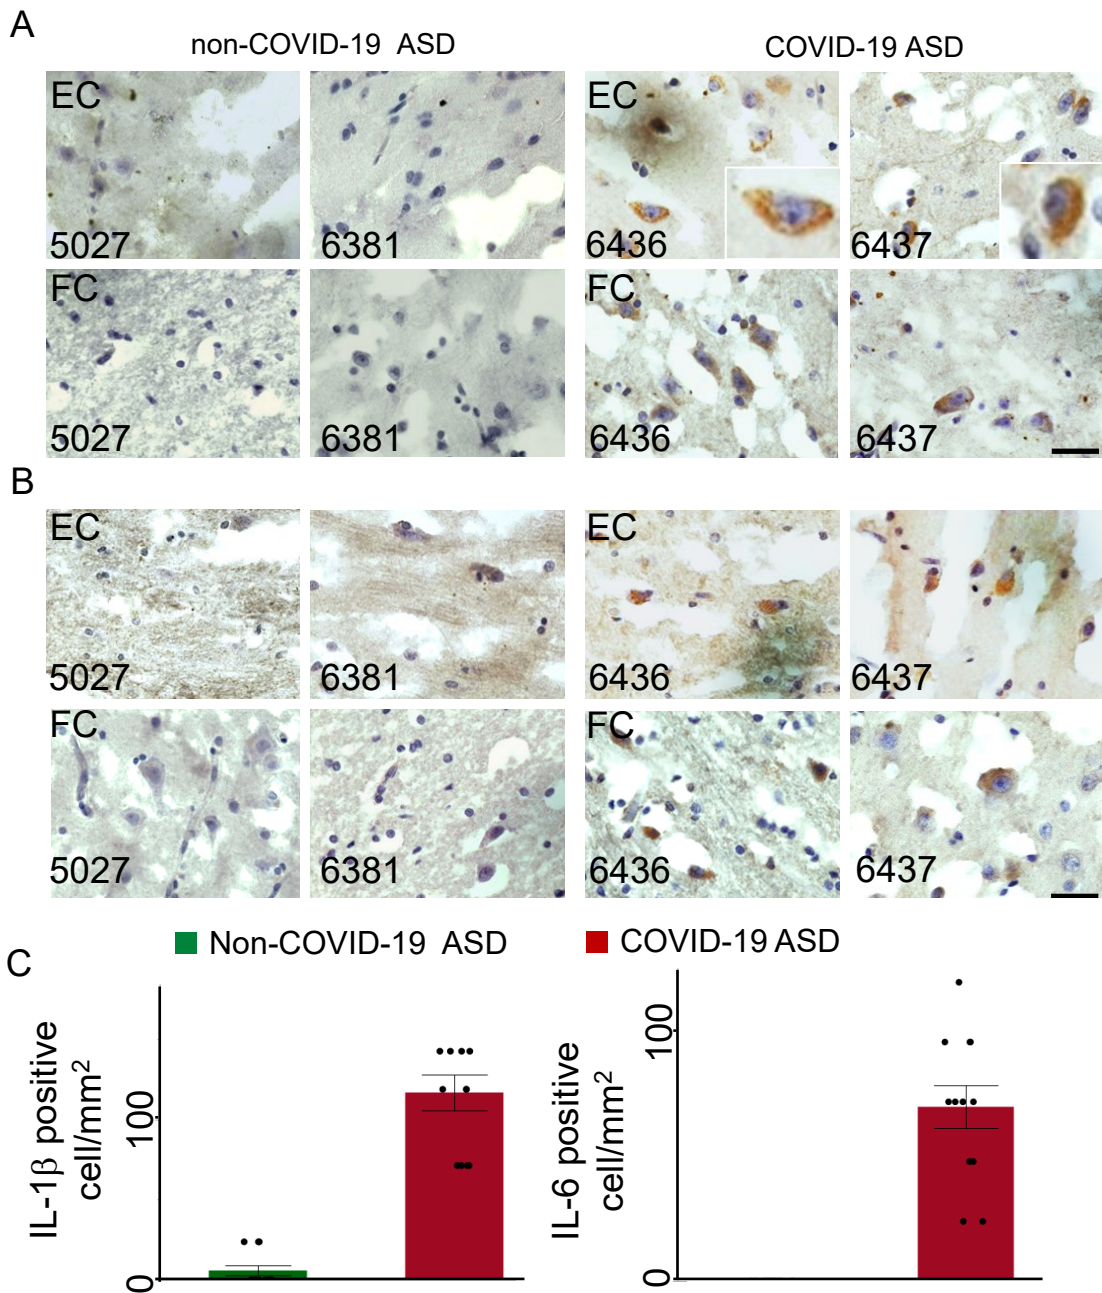



Fig. S5

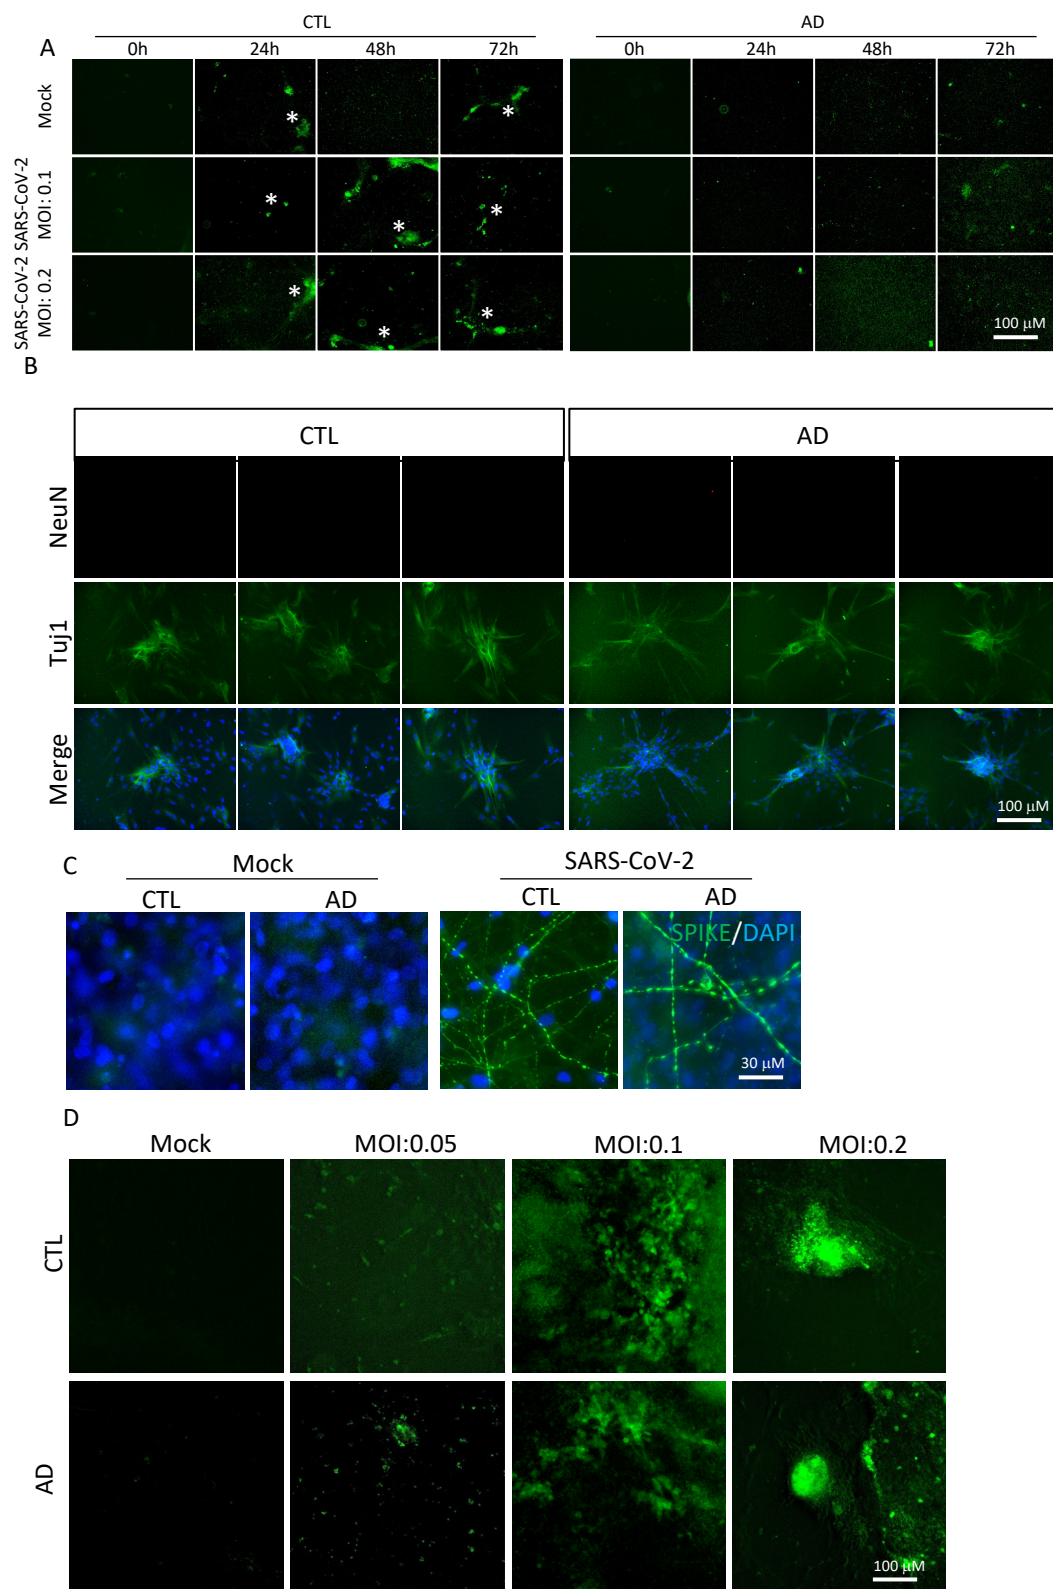

Fig. S6

**A**

| Gene    | CTL/AD | CTL/AD_V |
|---------|--------|----------|
| XAF1    | 1.60   | 3.58     |
| TWIST2  | 1.81   | 3.96     |
| CASP4   | 1.55   | 3.17     |
| CD34    | 1.82   | 3.54     |
| CCL4    | 2.83   | 5.49     |
| CCL3    | 3.40   | 6.44     |
| KLHDC7B | 1.79   | 3.33     |
| LILRB1  | 4.37   | 8.12     |
| GJB2    | 1.84   | 3.40     |
| LAIR1   | 1.92   | 3.38     |
| PLA2G7  | 2.08   | 3.66     |
| C3      | 2.31   | 4.05     |
| FIBIN   | 1.67   | 2.85     |
| HCK     | 1.99   | 3.36     |
| SP140L  | 1.60   | 2.68     |
| COMP    | 1.69   | 2.83     |
| SLC22A4 | 1.53   | 2.53     |
| LRRC25  | 2.42   | 3.91     |
| CTSS    | 2.38   | 3.78     |
| SLAMF8  | 2.16   | 3.36     |
| FERMT3  | 3.28   | 5.09     |
| NPL     | 1.55   | 2.38     |
| ITGAL   | 2.83   | 4.32     |
| AOAH    | 2.29   | 3.48     |
| CCL3L1  | 5.34   | 8.10     |

Deteriorated fold > 1.5  
Upregulated genes

**B**

| Gene     | CTL/AD | CTL/AD_V |
|----------|--------|----------|
| PLA2G2F  | -1.58  | -5.46    |
| CRYAA2   | -1.88  | -5.82    |
| ABCB11   | -1.65  | -4.64    |
| GJA8     | -1.81  | -5.06    |
| CRYBB3   | -1.76  | -4.11    |
| CRYBB1   | -2.58  | -5.90    |
| C1orf105 | -1.65  | -3.70    |
| CRYBA1   | -2.68  | -6.02    |
| MIP      | -3.11  | -6.95    |
| CRYBA4   | -2.58  | -5.66    |
| GPD1     | -1.60  | -3.43    |
| BHMT     | -2.52  | -5.31    |
| PITX3    | -2.07  | -4.33    |
| CRYBA2   | -3.24  | -6.72    |
| GJA3     | -1.63  | -3.38    |
| CRYGS    | -2.73  | -5.65    |
| PSG7     | -3.39  | -6.95    |
| PSG3     | -3.17  | -6.45    |
| KMO      | -1.78  | -3.62    |
| PSG2     | -3.57  | -7.24    |
| CRYGD    | -1.83  | -3.70    |
| CRYAB    | -2.33  | -4.53    |
| CRYBB2   | -2.84  | -5.46    |
| HSD3B1   | -1.60  | -2.96    |
| PROX1    | -1.67  | -2.99    |
| VIT      | -1.68  | -2.99    |
| ERICH5   | -1.59  | -2.80    |
| AQP5     | -1.70  | -2.96    |
| PSG1     | -2.66  | -4.61    |
| COLGALT2 | -1.56  | -2.61    |
| CRYGC    | -2.69  | -4.45    |
| ANKRD34C | -2.56  | -4.18    |
| DBX2     | -2.75  | -4.29    |
| MAMDC2   | -1.68  | -2.54    |

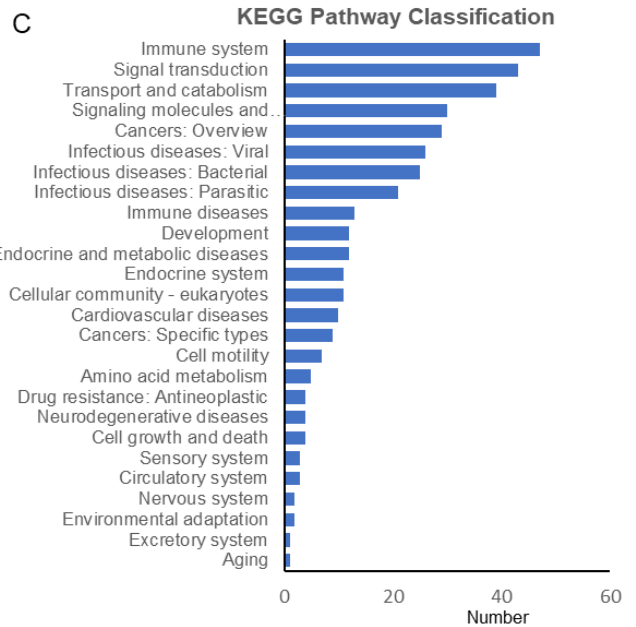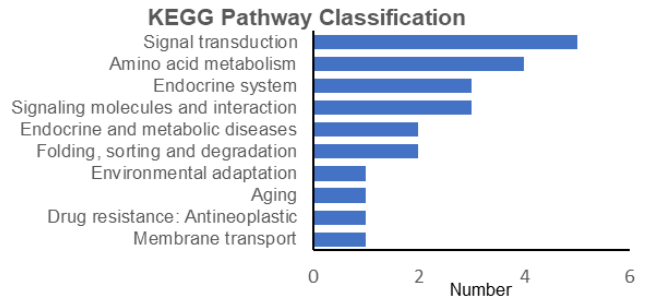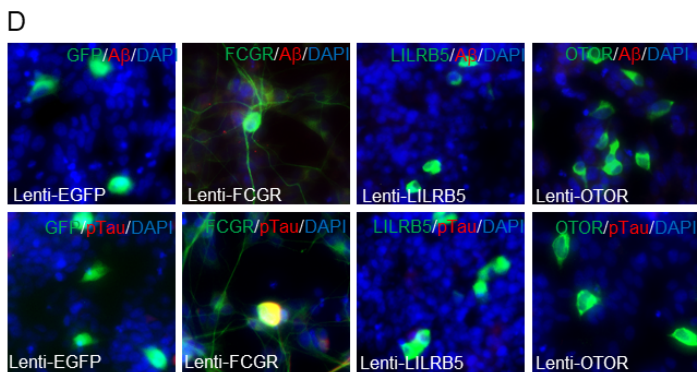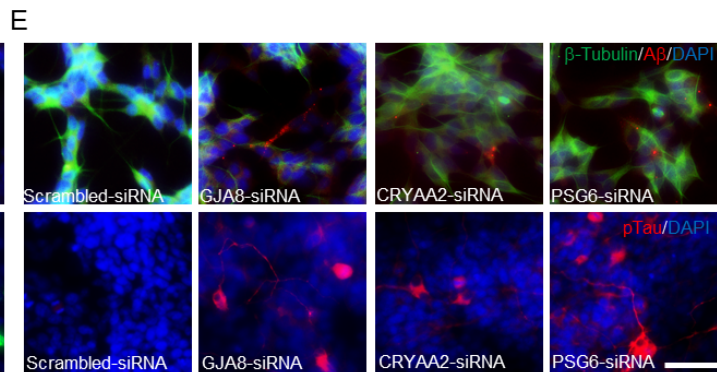

## Resource Tables

| <b><u>Antibody</u></b>                                                           | <b><u>Sources</u></b>     | <b><u>Identifier</u></b>         |
|----------------------------------------------------------------------------------|---------------------------|----------------------------------|
| Rabbit anti-SARS-CoV-2 spike glycoprotein antibody                               | Abcam                     | Cat# ab272504; RRID: AB_2847845  |
| Rabbit anti-SARS Nucleocapsid Protein Antibody                                   | Novus                     | Cat# NB100-56576; RRID:AB_838838 |
| Rabbit anti-human ACE2 polyclonal antibody                                       | Thermo Fisher Scientific  | Cat# PA5-20046; RRID: AB_1115262 |
| rabbit anti-neuropilin-1 antibody                                                | Abcam                     | Cat# ab81321; RRID: AB_164073    |
| Mouse anti-Glutamate Decarboxylase, 65 kDa Isoform (GAD65), clone GAD-6 antibody | millipore                 | Cat# mAB351; RRID: AB_2263126    |
| Mouse anti-Glutamine Synthetase, clone GS-6 antibody                             | millipore                 | Cat# MAB302; RRID: AB_2110656    |
| Rabbit anti-NeuN antibody                                                        | Abcam                     | Cat# ab177487; RRID: AB_2532109  |
| Anti-Galactocerebroside antibody produced in rabbit                              | Sigma-Aldrich             | Cat# 9152; RRID: AB_259984       |
| Rabbit anti-Glial Fibrillary Acidic Protein (GFAP) antibody                      | Agilent                   | Cat# Z0334; RRID: AB_10013382    |
| Anti- $\beta$ -Amyloid, 1-16 Antibody (Previously Covance catalog# SIG-39300)    | Biologend                 | Cat# 803014; RRID:AB_2728527     |
| $\beta$ -Amyloid (D3D2N) Mouse mAb                                               | Cell Signaling Technology | Cat# 15126; RRID:AB_2798720      |
| Rabbit anti-phospho-Tau (Ser202, Thr205) Monoclonal Antibody (AT8)               | Thermo Fisher Scientific  | Cat# MN1020; RRID: AB_223647     |
| Anti- $\beta$ -Amyloid (D54D2) XP® Rabbit mAb antibody                           | Cell Signaling Technology | Cat# 8243; RRID: AB_2797642      |
| Neurofilament-L (C28E10) Rabbit mAb antibody                                     | Cell Signaling Technology | Cat# 2837; RRID: AB_823575       |
| Rabbit anti-Cleaved Caspase-3 (Asp175) Antibody                                  | Cell Signaling Technology | Cat# 9661; RRID: AB_2341188      |
| Neuronal Class III beta-Tubulin (TUJ1) Mouse Monoclonal Antibody, Purified       | Covance                   | Cat# MMS-435P; RRID: AB_231377   |
| Rabbit anti Iba1, Rabbit antibody                                                | FUJIFILM Wako             | Cat# 019-19741; RRID:AB_839504   |
| Rabbit anti-RIP3 (phospho S227) antibody [EPR9627]                               | Abcam                     | Cat# ab209384; RRID: AB_2714035  |
| Rabbit anti-MLKL (phospho S358) antibody                                         | Abcam                     | Cat# ab187091; RRID: AB_2619685  |
| Mouse anti-TRANSFERRIN RECEPTOR Monoclonal Antibody (H68.4)                      | Thermo Fisher Scientific  | Cat# 13-6800; RRID: AB_86623     |

|                                                                     |                          |                                  |
|---------------------------------------------------------------------|--------------------------|----------------------------------|
| Rabbit anti-FACL4 (ASCL4) antibody [EPR8640]                        | Abcam                    | Cat# ab155282; RRID: AB_2714020  |
| Rabbit anti-DPP4/CD26 (D6D8K) antibody                              | Cell Signaling Tech      | Cat# 67138; RRID: AB_2728750     |
| Rabbit anti-phospho-Tau (Ser396) Polyclonal Antibody                | Thermo Fisher Scientific | Cat# 44-752G; RRID: AB_253374    |
| Rabbit anti-phospho-Tau (Ser214) Polyclonal Antibody                | Thermo Fisher Scientific | Cat# 44-742G; RRID: AB_2533740   |
| Rabbit anti-pTau-Ser202(PS202) antibody                             | In house                 |                                  |
| Rabbit Anti-Amyloid oligomer, abeta, oligomeric antibody            | Millipore                | Cat# AB9234; RRID: AB_570955     |
| Human IL-1 beta/IL-1F2 MAb (Clone 8516) antibody                    | R and D System           | Cat# MAB201; RRID:AB_358006      |
| Mouse Anti-Human IL-6 Monoclonal antibody, Unconjugated, Clone 1936 | R and D System           | Cat# MAB2061; RRID: AB_2127616   |
| CD3 Monoclonal Antibody (OKT3), Functional Grade                    | Thermo Fisher Scientific | Cat# 16-0037-81; RRID: AB_468854 |
| Mouse anti-human CD20 antibody                                      | Biologend                | Cat# 302301; RRID:AB_314249      |
| F8/40 mouse monoclonal antibody                                     | Santa Cru Biotech        | Cat# sc377009                    |
| Biotin-conjugated Goat anti-mouse IgG                               | Vector Lab               | Cat# BA-9200; RRID:AB_2336171    |
| Biotin-conjugated Goat anti-Rabbit IgG                              | Vector Lab               | Cat# BA-1000; RRID:AB_2313606    |
| Alexa488-donkey anti-mouse IgG                                      | Invitrogen               | Cat# A21201; RRID:AB_141630      |
| Alexa488-donkey anti-rabbit IgG                                     | Invitrogen               | Cat# A21206; RRID:AB_2535792     |
| Alexa594-donkey anti-mouse IgG                                      | Invitrogen               | Cat# A21203; RRID:AB_141633      |
| Alexa594-donkey anti-rabbit IgG                                     | Invitrogen               | Cat# A21207; RRID:AB_141637      |
| Goat anti-mouse IgG, alkaline phosphatase conjugated                | thermo Fisher Scientific | Cat# A21060; RRID:AB_2536528     |
| Goat anti-rabbit IgG, alkaline phosphatase conjugated               | thermo Fisher Scientific | Cat# A16099; RRID: AB_2534773    |
| Histofine Simple Stain MAX PO (R)                                   | Nichirei Bioscience      | Cat# 414141F                     |
| Histofine Simple Stain MAX PO (M)                                   | Nichirei Bioscience      | Cat# 414131F                     |

**Viral strain**

SARS-CoV-2, WA-1 strain - BEI

SARS-CoV-2 GFP

CMV Promoter Thomson Factors Lentivirus Set

**Sources**

CDC

provided by Dr. Ralph S. Baric

ABMgood, Canada

**Identifier**

Cat #NR-52281

[Hou et al.](#)

Cat# G353

## **Reagent or Resources**

## **Sources**

## **Identifier**

|                                                        |                          |                  |
|--------------------------------------------------------|--------------------------|------------------|
| Normal Donkey Serum                                    | Sigma                    | Cat# D9663       |
| PBS, pH7.4                                             | Quality Biological       | Cat# 119-069-131 |
| Triton X100                                            | Sigma                    | Cat# X100        |
| Hydrogen peroxide (H <sub>2</sub> O <sub>2</sub> )     | Sigma                    | Cat# H1009       |
| Antigen Retriever, Citrate buffer, pH6                 | Sigma                    | Cat# C9999       |
| Antigen Retriever, formic acid                         | Sigma                    | Cat# F0507       |
| VECTASTAIN Elite Kits                                  | VectorLab                | Cat# PK-6100     |
| SignalStain® Vibrant Red AP Substrate Kit              | Cell Signal Tech         | Cat# 76713       |
| DAB (3,3'-Diaminobenzidine tetrahydrochloride hydrate) | Sigma                    | Cat# D5637       |
| Hematoxylin Solution, Harris Modified                  | Sigma                    | Cat# HHS32       |
| Tissue-Plus OCT Compound                               | Fisher Scientific        | Cat# 23-730-571  |
| Ammonium Nickel (II) sulfate hexahydrate               | Sigma                    | Cat# A1827       |
| Lithium Carbonate                                      | Sigma                    | Cat# 255823      |
| Ethanol, Decon Labs, 200 proof                         | VWR                      | Cat# 71002-426   |
| Xylenes Histological Grade                             | Sigma                    | Cat# 534056      |
| Thioflavin-T                                           | Sigma                    | Cat# T3516       |
| DAPI (4',6-diamidino-2-phenylindole)                   | Thermo Fisher Scientific | Cat# D9542       |
| Permout mounting medium                                | Fisher                   | Cat# SP15100     |
| Fluorescence mounting medium                           | Sigma                    | Cat# F4680       |
| Paraformaldehyde (4%, pH7.4) in PBS                    | Thermo Fisher Scientific | Cat# J61889      |
| RNAscope® 2.5 HD Reagent Kit-RED                       | ACD                      | Cat# 322350      |
| RNAscope® Probe                                        | ACD                      | Cat# 854841      |
| Knockout DMEM medium                                   | Thermo Fisher Scientific | Cat# 10829018    |
| Knockout serum replacer                                | Thermo Fisher Scientific | Cat# 10828028    |
| Nonessential amino acids                               | Thermo Fisher Scientific | Cat# 11140050    |
| GlutaMAX                                               | Thermo Fisher Scientific | Cat# 35050061    |
| β-mercaptoethanol                                      | Sigma                    | Cat# M3148       |
| Recombinant human basic fibroblast growth factor       | Thermo Fisher Scientific | Cat# 13256-029   |
| Collagenase IV                                         | Stem Cell Technologies   | Cat# 17104019    |
| DMEM/F12                                               | Thermo Fisher Scientific | Cat# 11320033    |
| N2 supplement                                          | Thermo Fisher Scientific | Cat# 17502048    |
| Neurobasal medium                                      | Thermo Fisher Scientific | Cat# 21103049    |



|                                                              |                          |                 |
|--------------------------------------------------------------|--------------------------|-----------------|
| B27 supplement                                               | Thermo Fisher Scientific | Cat 17504044    |
| Penicillin/streptomycin                                      | Thermo Fisher Scientific | Cat# 15140122   |
| Stemolecule SB431542, TGF- $\beta$ inhibitor                 | Reprocell                | Cat# 04-0010-10 |
| LDN-193189, inhibitor of bone morphogenetic protein receptor | Reprocell                | Cat# 04-0074    |
| Matrigel                                                     | BD Biosciences           | Cat# 354277     |
| bFGF                                                         | Pepro Tech               | Cat# 100-18b    |
| EGF, epidermal growth factor                                 | Pepro Tech               | Cat# 100-47     |
| Heparin                                                      | Sigma                    | Cat# H4784      |
| Brain-derived neurotrophic factor, BDNF                      | Pepro Tech               | Cat# 450-02     |
| Glial cell-derived neurotrophic factor, GDNF                 | Pepro Tech               | Cat# 450-10     |
| X-tremeGENE siRNA transfection reagent, Roche                | Sigma                    | Cat# 6366236001 |
| SuperScript <sup>TM</sup> III Reverse Transcriptase kit      | Thermo Fisher Scientific | Cat# 18080051   |
| PowerUp <sup>TM</sup> SYBR <sup>TM</sup> Green Master Mix    | Thermo Fisher Scientific | Cat# A25742     |

| <b><u>Brain Tissue</u></b>                           | <b><u>Source</u></b> | <b><u>Identifier</u></b> |
|------------------------------------------------------|----------------------|--------------------------|
| Alzheimer's Disease (AD)-Covid19 brain tissue, Male, | NIH NeuroBioBank     | UMBN #6435               |
| Autism-Covid19 brain tissue, Female, 38 yr           | NIH NeuroBioBank     | UMBN #6436               |
| Autism-Covid19 brain tissue, Male, 30 yr             | NIH NeuroBioBank     | UMBN #6437               |
| Frontotemporal Dementia (FTD)-Covid19, Female, 71 yr | UCSD,                | #5922                    |
| Covid19, Male, 77 yr                                 | UCSD,                | #5932                    |
| Sporadic AD, Female, 65 yr                           | NIH NeuroBioBank     | #116311                  |
| Sporadic AD, Male, 63 yr                             | NIH NeuroBioBank     | #116319                  |
| Sporadic AD, Male, 63 yr                             | NIH NeuroBioBank     | #116317                  |
| Sporadic AD, Male, 79 yr                             | UCSD,                | #5877                    |
| Sporadic AD, Female, 71 yr                           | UCSD,                | #5875                    |
| Sporadic AD, Male, 76 yr                             | UCSD,                | #5872                    |
| Unaffected Control, Male, 29 yr                      | NIH NeuroBioBank     | UMBN #1502               |
| Unaffected Control, Male, 30 yr                      | NIH NeuroBioBank     | UMBN #6099               |
| Unaffected Control, Female, 38 yr                    | NIH NeuroBioBank     | UMBN #1648               |
| Unaffected Control, Male, 38 yr                      | NIH NeuroBioBank     | UMBN #5249               |
| Unaffected Control, Male, 38 yr                      | NIH NeuroBioBank     | UMBN #4592               |
| Unaffected Control, Female, 77 yr                    | NIH NeuroBioBank     | UMBN #1569               |
| Unaffected Control, Male, 75 yr                      | NIH NeuroBioBank     | UMBN #5830               |
| Unaffected Control, female, 76 yr                    | NIH NeuroBioBank     | UMBN #5219               |
| ASD-Autism, 37 yr                                    | NIH NeuroBioBank     | UMBN #5027               |
| ASD-Autism suspended, Epilepsy, 28 yr                | NIH NeuroBioBank     | UMBN #5934               |
| ASD-Autism, Epilepsy, 29 yr                          | NIH NeuroBioBank     | UMBN #5940               |
| ASD-Autism suspended, 35 yr                          | NIH NeuroBioBank     | UMBN #6092               |
| ASD-Autism suspended, 36 yr                          | NIH NeuroBioBank     | UMBN #6212               |
| ASD-Autism suspended, 30 yr                          | NIH NeuroBioBank     | UMBN #6381               |
| Frontotemporal dementia, 70yr                        | NIH NeuroBioBank     | UMBN #6220               |
| Frontotemporal dementia, 65yr                        | NIH NeuroBioBank     | UMBN #6019               |
| Frontotemporal dementia, 76yr                        | NIH NeuroBioBank     | UMBN #6264               |
| Frontotemporal dementia, 73yr                        | NIH NeuroBioBank     | UMBN #6207               |



**Cell lines**

iPSCs, from Familial AD, female, 31 yr  
iPSCs, from Sporadic AD, male, 60 yr  
iPSCs, from Sporadic AD, male, 83 yr  
iPSCs, from apparently healthy male, 55 yr  
iPSCs, from apparently healthy female, 36 yr  
iPSCs, from apparently healthy female, 36 yr  
Primary human neuron  
Vero E6 cells  
mouse embryonic fibroblasts (MEF)

**Source**

Coriell Institute  
Coriell Institute  
Coriell Institute  
Coriell Institute  
Coriell Institute  
Coriell Institute  
Neuromics  
ATCC  
Thermo Fisher  
Scientific

**Identifier**

Cat# AG25367  
Cat# AG07376  
Cat# GM24666  
Cat# GM23248  
Cat# GM23279  
Cat# GM23280  
HNC001  
CRL-1586  
Cat# A34180

### **Plasmid DNAs**

CRYAA2\_pcDNA3.1+/C-(K)-DYK  
GJA8\_pcDNA3.1+/C-(K)-DYK  
OTOR(NM\_020157.4) ORF Clone  
Human LILRB5(NM\_001081442.2) ORF Clone  
FCGR3A(NM\_000569.6) ORF Clone  
PSG6(NM\_001031850.4) ORF Clone

### **Source**

Genscript  
Genscript  
Genscript  
Genscript  
Genscript  
Genscript

### **Identifier**

Cat# OHu53183D  
Cat# OHu22749D  
Cat# OHu00520D  
Cat# OHu64562D  
Cat# OHu27381D  
Cat# OHu56074D

### **siRNAs**

GJA8 siRNA  
CRYAA2 siRNA  
PSG6 siRNA

### **Source**

Ambion  
Ambion  
Ambion

### **Identifier**

Cat# S5769  
Cat# 3540  
Cat# 11312

### **Lentiviru**

Otoraplin (OTOR) (NM\_020157) Human Tagged ORF Clone  
LILRB5 (NM\_001081443) Human Tagged ORF  
CD16 (FCGR3A) (NM\_000569) Human Tagged ORF

### **Source**

Origene  
  
Origene  
Origene

### **Identifier**

Cat# RC210984L4V  
  
Cat# RC219303L4V  
Cat# RC206429L2V

**Software and Algorithms**

**Source**

**Identifier**

GraphPad Prism 7  
photoshop CS3

GraphPad  
Adobe

NA  
NA

| <b>QPCR primers</b>                                                                        | <b>Sources</b>                    | <b>Identifier</b>            |
|--------------------------------------------------------------------------------------------|-----------------------------------|------------------------------|
| FCGR3A qPCR, mRNA forward: 5'-CCTCCTGTCTAGTCGGTTTGG; reverse: 5'-TCGAGCACCTGTACCATTGA      | Genbank Accession<br>NM_000569    | PrimerBank ID<br>24429586a1  |
| LILRA3 qPCR, mRNA forward: 5'-AGGAGTGGGACGTGACTT; reverse: 5'-GGTCTGGCACGGATCTGTC          | Genbank Accession<br>NM_006865    | PrimerBank ID<br>289547630c1 |
| TLR8 qPCR, mRNA forward: 5'-AACTGCCAAGCTCCCTACG; reverse: 5'-CAAGGCACGCATGGAAATGG          | Genbank Accession<br>NM_138636    | PrimerBank ID<br>257196253c3 |
| LILRB5 qPCR, mRNA forward: 5'-GACTGATCCCTGACATACCCG; reverse: 5'-GTGTCTATCTGATGCCATGACTG   | Genbank Accession<br>NM_006840    | PrimerBank ID<br>125987589c2 |
| OTOR qPCR, mRNA forward: 5'-TCTGGCTAGTCTCAAGAAGA; reverse: 5'-TAACCCACGACTCCCATCTCG        | Genbank Accession<br>NM_020157    | PrimerBank ID<br>21618345c1  |
| TMEM140 qPCR, mRNA forward: 5'-TCGGCTTCTATAACTTCTGCCT; reverse: 5'-CTGTTGCACTGGGCTAGGAG    | Genbank Accession<br>NM_018295    | PrimerBank ID<br>256355110c2 |
| SIGLEC1 qPCR, mRNA forward: 5'-ATGGGTACGCCTCCAAAC; reverse: 5'-GTGCCTCATTGGGTGTGTTG        | Genbank Accession<br>NM_023068    | PrimerBank ID<br>89142743c1  |
| CCL4 qPCR, mRNA forward: 5'-CTGTGCTGATCCCAGTGAATC; reverse: 5'-TCAGTTCAGTTCAGGTCATACA      | Genbank Accession<br>NM_002984    | PrimerBank ID<br>4506845a1   |
| SLCO2B1 qPCR, mRNA forward: 5'-TATGTGGACATTAACCAGATGCC; reverse: 5'-CTGTGACTGCTAAGACCTTTCC | Genbank Accession<br>NM_001145211 | PrimerBank ID<br>312176373c2 |
| TM4SF4 qPCR, mRNA forward: 5'-CTGTGGTTGGATTCTTGGGAG; reverse: 5'-GGGTAGCCCCATGTACTATTGG    | Genbank Accession<br>NM_004617    | PrimerBank ID<br>325974483c2 |
| XAF1 qPCR, mRNA forward: 5'-GCTCCACGAGTCTACTGTG; reverse: 5'-GTTCACTGCGACAGACATCTC         | Genbank Accession<br>NM_017523    | PrimerBank ID<br>378925606c1 |
| KCNQ5 qPCR, mRNA forward: 5'-TGTTGTGCATATAGAGGATGGCA; reverse: 5'-GAGTGCAGACGTGGCAAAAAT    | Genbank Accession<br>NM_001160134 | PrimerBank ID<br>236462241c3 |
| ANGPTL1 qPCR, mRNA forward: 5'-AGAAAGGAAAGCCGTAACATGAA; reverse: 5'-TCCCTGTATCTTGTGCCATCT  | Genbank Accession<br>NM_004673    | PrimerBank ID<br>38327520c3  |
| COL21A1 qPCR, mRNA forward: 5'-GGCCACAAATAGCAGTTACCT; reverse: 5'-AGCCTTCATCAAACAACGTCTTA  | Genbank Accession<br>NM_030820    | PrimerBank ID<br>90577174c2  |
| KLHDC7B qPCR, mRNA forward: 5'-GCACCATGCACAACACTACCTGT; reverse: 5'-ATTCCGCCACCGATGGCATAG  | Genbank Accession<br>NM_138433    | PrimerBank ID<br>206597555c1 |
| HAND2 qPCR, mRNA forward: 5'-CGCCGACACCAAACCTCTCC; reverse: 5'-TCGCCATTCTGGTGCCTCT         | Genbank Accession<br>NM_021973    | PrimerBank ID<br>88999597c2  |
| COMP qPCR, mRNA forward: 5'-CGAGTCCGCTGTATCAACACC; reverse: 5'-TCCGTGCAAACCTGCTTGT         | Genbank Accession<br>NM_000095    | PrimerBank ID<br>40217842c2  |
| SLC22A4 qPCR, mRNA forward: 5'-TGGTAGCCTTCATACTAGGAACA; reverse: 5'-TGGCAGCAGCATATAGCCAAC  | Genbank Accession<br>NM_003059    | PrimerBank ID<br>24497489c1  |
| PTPRH qPCR, mRNA forward: 5'-TCGCCCTATGCTGGGAAGT; reverse: 5'-TCTGCCATACAGAGAATGTGT        | Genbank Accession<br>NM_002842    | PrimerBank ID<br>241896923c2 |
| FGF10 qPCR, mRNA forward: 5'-CATGTGCGGAGCTACAATCAC; reverse: 5'-CAGGATGCTGTACGGGACAG       | Genbank Accession<br>NM_004465    | PrimerBank ID<br>4758359c1   |
| VIT qPCR, mRNA forward: 5'-TGTGCTTGATAATTCAGGAGGGA; reverse: 5'-GATTGGACACCGTTGGAATAACT    | Genbank Accession<br>NM_001177970 | PrimerBank ID<br>295789106c2 |
| GJA8 qPCR, mRNA forward: 5'-GACCTGCTGAGGACCTACAT; reverse: 5'-CCCAACTCCATCACGTTGAG         | Genbank Accession<br>NM_005267    | PrimerBank ID<br>281182631c2 |

|                                                                                                                          |                                   |                                     |
|--------------------------------------------------------------------------------------------------------------------------|-----------------------------------|-------------------------------------|
| PSG6 qPCR, mRNA forward: 5'-AAGCTGCCCATGCCTTACATC; reverse: 5'-AGGTGTAGTTCCGACTCTTAGG                                    | Genbank Accession<br>NM_001031850 | PrimerBank ID<br>141802170c1        |
| Amyloid precursor protein (APP), mRNA, forward: 5'-GTCTCTCTCCCTGCTCTACAA; reverse: 5'-GGCCAAGACGTCATCTGAATAG             | Genbank Accession<br>NM_000484    | <a href="#">Cairns et al., 2020</a> |
| ABeta secretase 1 (BACE1), mRNA, forward: 5'-CCATCCTTCCGCAGCAATA; reverse: 5'-CGTAGAAGCCCTCCATGATAAC                     | Genbank Accession<br>NM_012104    | <a href="#">Cairns et al., 2020</a> |
| Tumor necrosis factor alpha (TNF $\alpha$ ), mRNA, forward: 5'-GAGCCAAGCCCTGGTATG; reverse: 5'-CGGGCCGATTGATCTCAGC       | Genbank Accession<br>NM_000594.4  | <a href="#">Cairns et al., 2021</a> |
| Presenilin 1 (PSEN1), mRNA, forward: 5'-TGGCTACCATTAAGTCAGTCAGC; reverse: 5'-CCCACAGTCTCGGTATCTTCT                       | Genbank Accession<br>NM_000021    | <a href="#">Cairns et al., 2024</a> |
| Presenilin 2 (PSEN2), mRNA, forward: 5'-CTGACCGCTATGTCTGTAGTGG; reverse: 5'-CTTCGCTCCGTATTTGAGGGT                        | Genbank Accession<br>NM_012486    | <a href="#">Cairns et al., 2025</a> |
| Interleukin 6 (IL-6), mRNA, forward: 5'-TCAATATTAGAGTCTCAACCCCC; reverse: 5'-TTGTTTTCTGCCAGTGCCTC                        | Genbank Accession<br>NM_012486    | <a href="#">Cairns et al., 2026</a> |
| Interleukin 1beta (IL-1 $\beta$ ), mRNA, forward: 5'-CAGAAGTACCTGAGCTCGCC; reverse: 5'-AGATTCGTAGCTGGATGCCG              | Genbank Accession<br>NM_000576.2  | <a href="#">Cairns et al., 2027</a> |
| Interferon gamma (INF $\gamma$ ), mRNA, forward: 5'-ACTGTCGCCAGCAGCTAAAA; reverse: 5'-TATTGCAGGCAGGACAACCA               | Genbank Accession<br>NM_000619    | <a href="#">Cairns et al., 2028</a> |
| Glyceraldehyde 3-phosphate dehydrogenase (GAPDH), mRNA, forward: 5'-ATTGCCCTCAACGACCACT; reverse: 5'-ATGAGGTCCACCACCCTGT | Genbank Accession<br>NM_002046.5  | <a href="#">Cairns et al., 2030</a> |
| CDC 2019-nCoV_N1, forward: 5'-GAC CCC AAA ATC AGC GAA AT                                                                 | <a href="#">CDC</a>               | IDT, Cat#<br>10006821               |
| CDC 2019-nCoV_N1, reverse: 5'-TCT GGT TAC TGC CAG TTG AAT CTG                                                            | <a href="#">CDC</a>               | IDT, Cat#<br>10006822               |
| 2019-nCoV_N_Positive Control                                                                                             | <a href="#">IDT</a>               | IDT, Cat#<br>10006625               |
